# Supplementary material
Source: PubMed Central journal article supplement (PMC7025470)
Supplement: NIHMS1556141-supplement-SI.pdf [file NIHMS1556141-supplement-SI.pdf]

Mapping the phosphorylation of the human RNA polymerase II reveals that the identity and modification of the seventh residues of heptad repeats direct Tyr1 phosphorylation

**Nathaniel T. Burkholder**<sup>1\*</sup>, **Sarah N. Sipe**<sup>2\*</sup>, **Edwin E. Escobar**<sup>2</sup>, **Mukesh Kumar**<sup>1</sup>, **Seema Irani**<sup>1</sup>, **Wanjie Yang**<sup>1</sup>, **Haoyi Yu**<sup>1</sup>, **Wendy M. Matthews**<sup>1</sup>, **Jennifer S. Brodbelt**<sup>2,#</sup> and **Yan Zhang**<sup>1,3#</sup>

## SUPPORTING INFORMATION

**Table S1.** CTD construct sequences.

**Table S2.** Identified ions in UVPD-MS analysis of singly phosphorylated peaks from ABL1 treated, trypsin digested 26xDistal CTD substrate.

**Table S3.** Identified ions in UVPD-MS analysis of singly phosphorylated peaks from ABL1 treated 3xWT, 3xS7E Mid and Sp, and 3xS2E Mid substrates.

**Table S4.** Identified ions in UVPD-MS analysis of singly phosphorylated peaks from ABL1 treated, GluC digested 26xS7E Sp CTD substrate.

**Table S5.** Identified ions in UVPD-MS analysis of singly phosphorylated peaks from ABL1 treated 3xS7R Sp, Arg1810, and Cit1810 substrates.

**Table S6.** Identified ions in UVPD-MS analysis of singly phosphorylated peaks from ABL1 treated 3xS7K Sp and 3xS7Q Mid/Sp substrates.

**Table S1.** CTD construct sequences. 6xHis-GST sequence up to the 3C cleavage site is included in the distal CTD sequence, but is written in short hand for all sequences thereafter as “6xHis-GST - “. 3C cleavage site is underlined and the cleavage site is indicated with a dash (LEVLFQ/GP). Ser7 mutations are highlighted based on residue character (**red** – negatively charged, **purple** – positively charged, **green** – polar, **yellow** – nonpolar).

| CTD Protein/Peptide            | Sequence                                                                                                                                                                                                                                                                                                                                                                                                                                                                                                                                                                                                                                                                                                                                                                        |
|--------------------------------|---------------------------------------------------------------------------------------------------------------------------------------------------------------------------------------------------------------------------------------------------------------------------------------------------------------------------------------------------------------------------------------------------------------------------------------------------------------------------------------------------------------------------------------------------------------------------------------------------------------------------------------------------------------------------------------------------------------------------------------------------------------------------------|
| 6xHis-GST-human distal 26x CTD | MHHHHHSSMSPILGYWKIKGLVQPTRLLEYLEEKYEEHLYERDEGD<br>KWRNKKFELGLEFPNLPYYIDGDVKLTQSMARIYIADKHNMLGGCPKE<br>RAEISMLEGAVLDIRYGVSR IAYSKDFETLKVDFLSKLP EMLKMFEDRLC<br>HKTYLNGDHVTHPDFMLYDALDVVLYMDPMCLDAFPKLVCFKKR IEAIP<br>QIDKYLKSSKYIAWPLQG WQATFGGGDHPKSSS <u>LEVLFQ/GP</u> SGMS<br>PTSP <sup>N</sup> YTPTSP <sup>N</sup> YSPTSPSYSPTSPSYSPTSPSYSPPSSPR <sup>R</sup> YTPQSP <sup>T</sup> Y<br>TPSSPSYSPSSPSYSPTSP <sup>K</sup> YTPTSPSYSPPSSP <sup>R</sup> YTPTSP <sup>K</sup> YSPTSP <sup>K</sup> Y<br>SPTSP <sup>K</sup> YSPTSP <sup>T</sup> YSPTTP <sup>K</sup> YSPTSP <sup>T</sup> YSPTSP <sup>V</sup> YTPTSP <sup>K</sup> YSPTSP <sup>T</sup> Y<br>SPTSP <sup>K</sup> YSPTSP <sup>T</sup> YSPTSP <sup>K</sup> GSTYSPTSP <sup>G</sup> YSPTSP <sup>T</sup> YSLTSPAISPDD<br>SDEEN |
| 6xHis-GST-yeast 26x CTD        | 6xHis-GST -<br><u>GPGSGMGFGVSSPGFSPTSP</u> <sup>T</sup> YSPTSP <sup>A</sup> YSPTSPSYSPTSPSYSPTSP<br>SYSPTSPSYSPTSPSYSPTSPSYSPTSPSYSPTSPSYSPTSPSYSPTSP<br>SYSPTSPSYSPTSPSYSPTSPSYSPTSPSYSPTSP <sup>A</sup> YSPTSPSYSPTSP<br>SYSPTSPSYSPTSPSYSPTSP <sup>N</sup> YSPTSPSYSPTSP <sup>G</sup> YSPGSP <sup>A</sup> YSPKQ<br>DEQKHNEENSR                                                                                                                                                                                                                                                                                                                                                                                                                                               |
| 6xHis-GST-yeast 26x S7E CTD    | 6xHis-GST -<br><u>GPGSGMGFGVSSPGFSPTSP</u> <sup>R</sup> YSPTSP <sup>R</sup> YSPTSP <sup>R</sup> YSPTSP <sup>R</sup> YSPTS<br>P <sup>R</sup> YSPTSP <sup>R</sup> YSPTSP <sup>R</sup> YSPTSP <sup>R</sup> YSPTSP <sup>R</sup> YSPTSP <sup>R</sup> YSPTSP <sup>R</sup> YSPTS<br>P <sup>R</sup> YSPTSP <sup>R</sup> YSPTSP <sup>R</sup> YSPTSP <sup>R</sup> YSPTSP <sup>R</sup> YSPTSP <sup>R</sup> YSPTSP <sup>R</sup> YSPTS<br>P <sup>R</sup> YSPTSP <sup>R</sup> YSPTSP <sup>R</sup> YSPTSP <sup>R</sup> YSPTSP <sup>R</sup> YSPTSP <sup>R</sup> YSPGSP <sup>R</sup> YSPK<br>QDEQKHNEENSR                                                                                                                                                                                        |
| 6xHis-GST-yeast 26x S7E Sp CTD | 6xHis-GST -<br><u>GPGSGMGFGVSSPGFSPTSP</u> <sup>R</sup> YSPTSP <sup>A</sup> YSPTSP <sup>R</sup> YSPTSPSYSPTS<br>P <sup>R</sup> YSPTSPSYSPTSP <sup>R</sup> YSPTSPSYSPTSP <sup>R</sup> YSPTSPSYSPTSP <sup>R</sup> YSPTS<br>PSYSPTSP <sup>R</sup> YSPTSPSYSPTSP <sup>R</sup> YSPTSPSYSPTSP <sup>R</sup> YSPTSPSYSPTS<br>P <sup>R</sup> YSPTSPSYSPTSP <sup>R</sup> YSPTSP <sup>N</sup> YSPTSP <sup>R</sup> YSPTSP <sup>G</sup> YSPGSP <sup>R</sup> YSPK<br>QDEQKHNEENSR                                                                                                                                                                                                                                                                                                             |
| 6xHis-GST-3xWT                 | 6xHis-GST - <u>GPGSGM</u> SPSYSPTSPSYSPTSPSYSPT                                                                                                                                                                                                                                                                                                                                                                                                                                                                                                                                                                                                                                                                                                                                 |
| 6xHis-GST-3xS7E Sp             | 6xHis-GST - <u>GPGSGM</u> SP <sup>R</sup> YSPTSPSYSPTSP <sup>R</sup> YSPT                                                                                                                                                                                                                                                                                                                                                                                                                                                                                                                                                                                                                                                                                                       |
| 6xHis-GST-3xS7E Mid            | 6xHis-GST - <u>GPGSGM</u> SPSYSPTSP <sup>R</sup> YSPTSPSYSPT                                                                                                                                                                                                                                                                                                                                                                                                                                                                                                                                                                                                                                                                                                                    |

|                                      |                                                 |
|--------------------------------------|-------------------------------------------------|
| 6xHis-GST-3xS7R Sp                   | 6xHis-GST - <u>G</u> PGSGMSPRYSPTSPSYSPTSPRYSPT |
| 6xHis-GST-3xS7R Mid                  | 6xHis-GST - <u>G</u> PGSGMSPSYSPTSPRYSPTSPSYSPT |
| 6xHis-GST-3xS7K Sp                   | 6xHis-GST - <u>G</u> PGSGMSPKYSPTSPSYSPTSPKYSPT |
| 6xHis-GST-3xS7K Mid                  | 6xHis-GST - <u>G</u> PGSGMSPSYSPTSPKYSPTSPSYSPT |
| 6xHis-GST-3xS7Q Sp                   | 6xHis-GST - <u>G</u> PGSGMSPQYSPTSPSYSPTSPQYSPT |
| 6xHis-GST-3xS7Q Mid                  | 6xHis-GST - <u>G</u> PGSGMSPSYSPTSPQYSPTSPSYSPT |
| Distal CTD 1801-1822 Arg1810 peptide | H-SPSYSPSSPRYSPTQSPRYSPTSS-OH                   |
| Distal CTD 1801-1822 Cit1810 peptide | H-SPSYSPSSPCYSPTQSPRYSPTSS-OH                   |

---

**Table S2.** Identified ions in UVPD-MS analysis of singly phosphorylated peaks from ABL1 treated, trypsin digested 26xDistal CTD substrate (Fig. 1B-G). The phosphorylated Tyr1 sites were shown in blue boxes.

**A) Repeat 32 pTyr1 peak:**

Y T P Q S L P T V I T L P S S L P S Y L S L P L S L P L S L P T 25  
26 S P K

| Identified Ions | Theoretical Mass | Observed Mass | Mass Error (ppm) |
|-----------------|------------------|---------------|------------------|
| Y5              | 528.2908         | 528.2921      | 2.5              |
| B4              | 569.1887         | 569.1895      | 1.4              |
| Y6              | 615.3228         | 615.3235      | 1.2              |
| B5              | 656.2207         | 656.2231      | 3.6              |
| Y7              | 778.3861         | 778.3909      | 6.1              |
| C7              | 871.3475         | 871.3498      | 2.7              |
| X8              | 891.3974         | 891.3991      | 1.9              |
| Y9              | 962.4709         | 962.4735      | 2.7              |
| B8              | 1017.384         | 1017.386      | 1.6              |
| Y10             | 1049.503         | 1049.504      | 1.2              |
| B9              | 1118.432         | 1118.433      | 0.4              |
| Y11             | 1136.535         | 1136.538      | 2.4              |
| Y12             | 1233.588         | 1233.59       | 2.0              |
| Y13             | 1320.62          | 1320.624      | 3.0              |
| B12             | 1389.549         | 1389.551      | 1.5              |
| Y14             | 1483.683         | 1483.684      | 0.3              |
| C14             | 1590.66          | 1590.663      | 2.1              |
| Y16             | 1667.768         | 1667.769      | 0.8              |
| Y17             | 1754.8           | 1754.806      | 3.6              |
| Y19             | 1938.885         | 1938.889      | 2.3              |
| Y20             | 2039.932         | 2039.943      | 5.1              |
| Y23             | 2401.096         | 2401.1        | 1.6              |
| Y24             | 2488.128         | 2488.129      | 0.5              |

**Repeat 33 pTyr1 peak:**

Y T P Q S L P T V I T L P S S L P S Y L S L P L S L P L S L P T 25  
26 S P K

| Identified Ions | Theoretical Mass | Observed Mass | Mass Error (ppm) |
|-----------------|------------------|---------------|------------------|
| Y2              | 243.1583         | 243.1587      | 1.7              |
| Y5              | 528.2908         | 528.2912      | 0.9              |
| B5              | 576.2544         | 576.2557      | 2.3              |
| Y6              | 615.3228         | 615.324       | 2.0              |
| Y7              | 778.3861         | 778.3874      | 1.7              |
| Y8              | 865.4181         | 865.4201      | 2.3              |
| Y9              | 962.4709         | 962.4729      | 2.0              |
| B8              | 1017.384         | 1017.385      | 1.0              |
| Y10             | 1049.503         | 1049.506      | 3.0              |
| B9              | 1118.432         | 1118.431      | -1.5             |
| Y11             | 1136.535         | 1136.537      | 1.5              |
| Y12             | 1233.588         | 1233.592      | 3.4              |
| Y13             | 1320.62          | 1320.623      | 2.6              |
| B12             | 1389.549         | 1389.553      | 3.0              |
| C14             | 1590.66          | 1590.655      | -3.1             |
| Y16             | 1667.768         | 1667.77       | 1.4              |
| Y17             | 1754.8           | 1754.802      | 0.9              |
| B16             | 1823.729         | 1823.731      | 1.1              |
| Y19             | 1938.885         | 1938.888      | 1.8              |
| Y23             | 2481.062         | 2481.058      | -2.0             |
| Y24             | 2568.095         | 2568.098      | 1.5              |

**Repeat 34 pTyr1 peak:**

Y T P Q S L P T V I T L P S S L P S Y L S L P L S L P L S L P T 25  
26 S P K

| Identified Ions | Theoretical Mass | Observed Mass | Mass Error (ppm) |
|-----------------|------------------|---------------|------------------|
| Y2              | 243.1583         | 243.1587      | 1.8              |
| Y3              | 330.1903         | 330.1908      | 1.3              |
| B4              | 489.2224         | 489.2242      | 3.8              |
| Y5              | 528.2908         | 528.2923      | 2.8              |
| B5              | 576.2544         | 576.2569      | 4.3              |
| Y6              | 615.3228         | 615.3242      | 2.4              |
| B7              | 774.3548         | 774.3569      | 2.6              |
| Y7              | 778.3861         | 778.3898      | 4.7              |
| C7              | 791.3811         | 791.3837      | 3.3              |
| X8              | 891.3974         | 891.4025      | 5.7              |
| B8              | 937.4182         | 937.4202      | 2.2              |
| Y9              | 962.4709         | 962.4738      | 3.0              |
| B9              | 1038.466         | 1038.47       | 3.9              |
| Y10             | 1049.503         | 1049.505      | 1.9              |
| Y11             | 1136.535         | 1136.539      | 3.2              |
| B11             | 1222.551         | 1222.548      | -2.4             |
| Y12             | 1233.588         | 1233.591      | 2.6              |
| B12             | 1309.583         | 1309.585      | 2.0              |
| Y13             | 1320.62          | 1320.627      | 5.2              |
| Y14             | 1563.649         | 1563.651      | 0.8              |
| B15             | 1736.697         | 1736.692      | -2.8             |
| Y16             | 1747.734         | 1747.738      | 2.0              |
| B16             | 1823.729         | 1823.731      | 1.2              |
| Y17             | 1834.766         | 1834.771      | 2.8              |
| Y19             | 2018.851         | 2018.857      | 3.0              |
| Y20             | 2119.899         | 2119.906      | 3.4              |
| Y21             | 2282.962         | 2282.966      | 1.9              |
| Y23             | 2481.062         | 2481.073      | 4.4              |
| Y24             | 2568.095         | 2568.102      | 2.9              |

**Repeat 35 pTyr1 peak:**

Y T P Q S L P T V I T L P S S L P S Y L S L P L S L P L S L P T 25  
26 S P K

| Identified Ions | Theoretical Mass | Observed Mass | Mass Error (ppm) |
|-----------------|------------------|---------------|------------------|
| Y2              | 243.1583         | 243.1586      | 1.4              |
| Y3              | 330.1903         | 330.1906      | 0.9              |
| Y5              | 528.2908         | 528.2918      | 2.0              |
| Y6              | 615.3228         | 615.3238      | 1.6              |
| C7              | 791.3811         | 791.3823      | 1.4              |
| Y7              | 858.3524         | 858.3566      | 4.9              |
| B8              | 937.4182         | 937.4217      | 3.8              |
| B9              | 1038.466         | 1038.469      | 3.2              |
| Y9              | 1042.437         | 1042.439      | 1.3              |
| Y10             | 1129.469         | 1129.471      | 1.4              |
| Y11             | 1216.501         | 1216.496      | -4.0             |
| B12             | 1309.583         | 1309.583      | 0.5              |
| Y12             | 1313.554         | 1313.557      | 2.1              |
| Y13             | 1400.586         | 1400.588      | 1.2              |
| B15             | 1656.731         | 1656.735      | 2.3              |
| B16             | 1743.763         | 1743.765      | 1.4              |
| Y16             | 1747.734         | 1747.737      | 1.8              |
| Y17             | 1834.766         | 1834.768      | 0.9              |
| Y19             | 2018.851         | 2018.852      | 0.7              |
| Y20             | 2119.899         | 2119.9        | 0.8              |
| Y23             | 2481.062         | 2481.069      | 2.7              |
| Y24             | 2568.095         | 2568.099      | 1.7              |

**B) Repeat 36 pTyr1 peak:**

Y TLP T L S L P S L Y L S L P L S L S L P L E L V L T L P L T L S L P K

| Identified Ions | Theoretical Mass | Observed Mass | Mass Error (ppm) |
|-----------------|------------------|---------------|------------------|
| A1              | 215.0347         | 215.0341      | -2.9             |
| Y2              | 243.1583         | 243.1584      | 0.4              |
| Y2              | 243.1583         | 243.1584      | 0.4              |
| Z3              | 314.1716         | 314.1715      | -0.1             |
| A2              | 316.0824         | 316.0825      | 0.1              |
| Y3              | 330.1903         | 330.1902      | -0.4             |
| B2              | 344.0773         | 344.0774      | 0.2              |
| Z4              | 415.2192         | 415.2187      | -1.4             |
| X+4             | 458.2251         | 458.2257      | 1.3              |
| Y5              | 528.2908         | 528.2911      | 0.6              |
| B4              | 542.1778         | 542.1781      | 0.6              |
| Z6              | 613.3197         | 613.3188      | -1.4             |
| B5              | 629.2098         | 629.2104      | 0.9              |
| Y6              | 629.3384         | 629.3383      | -0.3             |
| Y7              | 792.4018         | 792.4029      | 1.4              |
| X7              | 818.381          | 818.3819      | 1.0              |
| C7              | 830.3209         | 830.3215      | 0.7              |
| Y8              | 921.4444         | 921.4443      | 0.0              |
| X8              | 947.4236         | 947.4241      | 0.5              |
| B8              | 976.3579         | 976.3582      | 0.3              |
| Y9              | 1018.497         | 1018.498      | 1.0              |
| B9              | 1063.39          | 1063.39       | 0.1              |
| Y10             | 1105.529         | 1105.531      | 1.4              |
| Z11             | 1176.542         | 1176.543      | 0.8              |
| Y11             | 1192.561         | 1192.562      | 0.4              |
| X11             | 1218.54          | 1218.543      | 2.0              |
| Y12             | 1289.614         | 1289.614      | -0.2             |
| B12             | 1334.507         | 1334.509      | 1.5              |
| Y13             | 1376.646         | 1376.647      | 1.0              |
| A+13            | 1404.572         | 1404.578      | 3.8              |
| A+14            | 1533.615         | 1533.616      | 0.4              |
| Y14             | 1539.709         | 1539.711      | 1.0              |
| C14             | 1577.628         | 1577.629      | 0.2              |
| Y16             | 1723.794         | 1723.798      | 2.4              |
| Y17             | 1810.826         | 1810.831      | 2.9              |
| Y19             | 2008.927         | 2008.926      | -0.2             |

**Repeat 37 pTyr1 peak:**

Y TLP T L S L P S L Y L S L P L S L S L P L E L V L T L P L T L S L P K

| Identified Ions | Theoretical Mass | Observed Mass | Mass Error (ppm) |
|-----------------|------------------|---------------|------------------|
| Y2              | 243.1583         | 243.1584      | 0.5              |
| Y3              | 330.1903         | 330.1902      | -0.3             |
| Z4              | 415.2192         | 415.2191      | -0.2             |
| B4              | 462.2115         | 462.212       | 1.3              |
| Y5              | 528.2908         | 528.2912      | 0.8              |
| C5              | 566.2698         | 566.2709      | 1.9              |
| Z6              | 613.3197         | 613.319       | -1.0             |
| Y6              | 629.3384         | 629.3391      | 1.0              |
| B7              | 733.3283         | 733.3273      | -1.4             |
| C7              | 750.3546         | 750.3556      | 1.4              |
| Y7              | 792.4018         | 792.4029      | 1.4              |
| Y8              | 921.4444         | 921.4476      | 3.5              |
| X8              | 947.4236         | 947.4185      | -5.4             |
| B8              | 976.3579         | 976.3582      | 0.3              |
| Y9              | 1018.497         | 1018.498      | 1.1              |
| B9              | 1063.39          | 1063.389      | -1.2             |
| Y10             | 1105.529         | 1105.53       | 1.0              |
| Y11             | 1192.561         | 1192.564      | 2.0              |
| X11             | 1218.54          | 1218.534      | -5.3             |
| B11             | 1247.475         | 1247.474      | -0.3             |
| Y12             | 1289.614         | 1289.614      | -0.1             |
| B12             | 1334.507         | 1334.51       | 2.8              |
| Y13             | 1376.646         | 1376.648      | 1.6              |
| B14             | 1560.602         | 1560.606      | 2.8              |
| C14             | 1577.628         | 1577.627      | -1.1             |
| B15             | 1723.665         | 1723.666      | 0.6              |
| Y16             | 1803.76          | 1803.763      | 1.6              |
| Y17             | 1890.792         | 1890.797      | 2.7              |
| Y19             | 2088.893         | 2088.897      | 2.0              |

**Repeat 38 pTyr1 peak:**

Y TLP T L S L P L S L Y L S L P L S L S L P L E L V L T L P L T L S L P K

| Identified Ions | Theoretical Mass | Observed Mass | Mass Error (ppm) |
|-----------------|------------------|---------------|------------------|
| Y2              | 243.1583         | 243.1583      | 0.0              |
| B2              | 264.111          | 264.111       | 0.0              |
| Y3              | 330.1903         | 330.1904      | 0.3              |
| Z4              | 415.2192         | 415.2191      | -0.4             |
| B4              | 462.2115         | 462.2116      | 0.4              |
| Y5              | 528.2908         | 528.2908      | 0.1              |
| Z6              | 613.3197         | 613.3191      | -0.9             |
| Y6              | 629.3384         | 629.3386      | 0.3              |
| C7              | 750.3546         | 750.3554      | 1.1              |
| Y7              | 872.3681         | 872.3687      | 0.7              |
| B8              | 896.3916         | 896.392       | 0.4              |
| B9              | 983.4236         | 983.421       | -2.6             |
| Y8              | 1001.411         | 1001.411      | 0.7              |
| Y9              | 1098.463         | 1098.465      | 1.4              |
| B11             | 1167.508         | 1167.506      | -1.9             |
| Y10             | 1185.495         | 1185.496      | 0.4              |
| B12             | 1254.54          | 1254.541      | 0.5              |
| Y11             | 1272.528         | 1272.526      | -1.2             |
| Y12             | 1369.58          | 1369.581      | 0.5              |
| Y13             | 1456.612         | 1456.614      | 1.4              |
| Y14             | 1619.676         | 1619.674      | -1.1             |
| Y15             | 1706.708         | 1706.705      | -1.7             |
| Y16             | 1803.76          | 1803.763      | 1.3              |
| Y17             | 1890.792         | 1890.795      | 1.3              |
| Y19             | 2088.893         | 2088.895      | 0.9              |

**C) Repeat 41 pTyr1 peak:**

N Y L S L P L T L S L P L T L Y L S L P L T L T L P K

| Identified Ions | Theoretical Mass | Observed Mass | Mass Error (ppm) |
|-----------------|------------------|---------------|------------------|
| Y2              | 243.1583         | 243.1584      | 0.4              |
| Z4              | 429.2349         | 429.235       | 0.3              |
| X4              | 471.2329         | 471.2328      | -0.2             |
| B4              | 528.1621         | 528.1626      | 0.8              |
| Y5              | 542.3064         | 542.3067      | 0.6              |
| Z6              | 613.3197         | 613.3203      | 1.0              |
| Y6              | 629.3384         | 629.3398      | 2.2              |
| Y7              | 792.4018         | 792.4025      | 1.0              |
| C7              | 830.3209         | 830.3131      | -9.4             |
| Z8              | 877.4307         | 877.4294      | -1.5             |
| Y8              | 893.4494         | 893.4509      | 1.7              |
| X+8             | 920.4365         | 920.4333      | -3.5             |
| A8              | 948.363          | 948.3629      | -0.1             |
| B8              | 976.3579         | 976.3588      | 0.9              |
| Y9              | 990.5022         | 990.5033      | 1.1              |
| C8              | 993.3842         | 993.3832      | -1.0             |
| Y10             | 1077.534         | 1077.535      | 1.1              |
| Y11             | 1178.582         | 1178.585      | 2.7              |
| X11             | 1204.561         | 1204.561      | -0.4             |
| Y12             | 1275.635         | 1275.636      | 0.7              |
| C11             | 1278.517         | 1278.515      | -1.2             |
| A12             | 1334.543         | 1334.541      | -1.4             |
| B12             | 1362.538         | 1362.538      | -0.4             |
| Y13             | 1362.667         | 1362.668      | 0.8              |

**Repeat 42 pTyr1 peak:**

N Y L S L P L T L S L P L T L Y L S L P L T L T L P K

| Identified Ions | Theoretical Mass | Observed Mass | Mass Error (ppm) |
|-----------------|------------------|---------------|------------------|
| Y2              | 243.1583         | 243.1584      | 0.4              |
| C2              | 267.1217         | 267.122       | 1.1              |
| Z4              | 429.2349         | 429.2351      | 0.5              |
| Y5              | 542.3064         | 542.3065      | 0.2              |
| Y6              | 629.3384         | 629.3383      | -0.2             |
| Y7              | 872.3681         | 872.3679      | -0.2             |
| X7              | 898.3474         | 898.3471      | -0.3             |
| A8              | 948.363          | 948.3613      | -1.8             |
| Y8              | 973.4158         | 973.4163      | 0.5              |
| X8              | 999.395          | 999.3945      | -0.5             |
| A+9             | 1036.403         | 1036.401      | -2.0             |
| Y9              | 1070.469         | 1070.464      | -4.1             |
| Y10             | 1157.501         | 1157.501      | 0.4              |
| Y11             | 1258.548         | 1258.551      | 2.3              |
| X11             | 1284.528         | 1284.526      | -0.8             |
| Y12             | 1355.601         | 1355.602      | 0.9              |
| B12             | 1362.538         | 1362.539      | 0.5              |
| Y13             | 1442.633         | 1442.636      | 2.0              |

D) Repeat 43 pTyr1 peak:

Y SLP T L S L P T L V L S L P L T L S L P L T L S L P K

| Identified Ions | Theoretical Mass | Observed Mass | Mass Error (ppm) |
|-----------------|------------------|---------------|------------------|
| Y2              | 243.1583         | 243.1585      | 0.8              |
| X+2             | 270.1454         | 270.1456      | 0.7              |
| B2              | 330.0617         | 330.0619      | 0.7              |
| Y3              | 330.1903         | 330.1903      | -0.1             |
| Z4              | 415.2192         | 415.219       | -0.5             |
| B4              | 528.1621         | 528.1626      | 0.9              |
| Y5              | 528.2908         | 528.2907      | 0.0              |
| Z6              | 613.3197         | 613.3201      | 0.7              |
| B5              | 615.1942         | 615.1943      | 0.3              |
| Y6              | 629.3384         | 629.3392      | 1.2              |
| Y7              | 792.4018         | 792.402       | 0.3              |
| B7              | 813.2946         | 813.296       | 1.7              |
| X+7             | 819.3889         | 819.3881      | -0.9             |
| C7              | 830.3209         | 830.3202      | -0.8             |
| Z8              | 875.4514         | 875.4543      | 3.3              |
| Y8              | 891.4702         | 891.4719      | 1.9              |
| X8              | 917.4494         | 917.4498      | 0.4              |
| A8              | 948.363          | 948.3627      | -0.3             |
| B8              | 976.3579         | 976.358       | 0.1              |
| Y9              | 988.5229         | 988.5234      | 0.5              |
| B9              | 1063.39          | 1063.391      | 0.9              |
| Y10             | 1075.555         | 1075.555      | 0.4              |
| Z11             | 1160.584         | 1160.587      | 3.0              |
| Y11             | 1176.603         | 1176.606      | 3.1              |
| X+11            | 1203.59          | 1203.59       | -0.1             |
| B11             | 1261.49          | 1261.493      | 2.4              |
| Y12             | 1273.655         | 1273.656      | 0.6              |
| B12             | 1348.522         | 1348.523      | 0.3              |
| Y13             | 1360.687         | 1360.688      | 0.3              |
| A+13            | 1418.588         | 1418.587      | -0.5             |
| A+14            | 1517.657         | 1517.657      | 0.5              |
| Y14             | 1523.751         | 1523.751      | 0.3              |
| B14             | 1544.644         | 1544.65       | 4.4              |
| C14             | 1561.67          | 1561.666      | -2.6             |
| Y16             | 1721.851         | 1721.853      | 1.1              |
| Y17             | 1808.883         | 1808.89       | 3.9              |
| Y19             | 2006.984         | 2006.989      | 2.5              |

Repeat 44 pTyr1 peak:

Y SLP T L S L P L T L S L P L T L S L P L T L S L P K

| Identified Ions | Theoretical Mass | Observed Mass | Mass Error (ppm) |
|-----------------|------------------|---------------|------------------|
| Y2              | 243.1583         | 243.1585      | 0.7              |
| C2              | 267.1217         | 267.1221      | 1.6              |
| X+2             | 270.1454         | 270.1454      | 0.0              |
| Y3              | 330.1903         | 330.1904      | 0.2              |
| Z4              | 415.2192         | 415.2184      | -2.1             |
| Y4              | 431.238          | 431.2382      | 0.5              |
| B4              | 448.1958         | 448.1957      | -0.2             |
| C4              | 465.2221         | 465.2235      | 2.9              |
| Y5              | 528.2908         | 528.2913      | 1.0              |
| B5              | 535.2278         | 535.2282      | 0.6              |
| X+5             | 555.2778         | 555.278       | 0.4              |
| Z6              | 613.3197         | 613.3192      | -0.8             |
| Y6              | 629.3384         | 629.339       | 1.0              |
| C6              | 649.3069         | 649.3078      | 1.4              |
| B7              | 733.3283         | 733.326       | -3.1             |
| Y7              | 792.4018         | 792.403       | 1.6              |
| X7              | 818.381          | 818.3817      | 0.8              |
| Z8              | 875.4514         | 875.4531      | 1.9              |
| X8              | 917.4494         | 917.4531      | 3.9              |
| A8              | 948.363          | 948.3637      | 0.7              |
| B8              | 976.3579         | 976.3601      | 2.3              |
| Y9              | 988.5229         | 988.5238      | 0.8              |
| C8              | 993.3842         | 993.3857      | 1.5              |
| A+9             | 1036.403         | 1036.4        | -2.8             |
| Y10             | 1075.555         | 1075.557      | 1.7              |
| C9              | 1080.416         | 1080.417      | 1.0              |
| Z11             | 1160.584         | 1160.586      | 1.8              |
| Y11             | 1176.603         | 1176.605      | 2.1              |
| X+11            | 1203.59          | 1203.592      | 1.6              |
| B11             | 1261.49          | 1261.49       | 0.1              |
| Y12             | 1273.655         | 1273.658      | 2.2              |
| B12             | 1348.522         | 1348.525      | 2.1              |
| Y13             | 1360.687         | 1360.69       | 1.5              |
| B13             | 1445.575         | 1445.58       | 3.4              |
| A14             | 1516.649         | 1516.655      | 4.1              |
| B14             | 1544.644         | 1544.648      | 2.9              |
| C14             | 1561.67          | 1561.67       | 0.1              |
| Y14             | 1603.717         | 1603.717      | -0.1             |
| A15             | 1679.712         | 1679.718      | 3.6              |
| B15             | 1707.707         | 1707.706      | -0.7             |
| Y16             | 1801.818         | 1801.819      | 0.9              |
| B16             | 1808.755         | 1808.757      | 1.2              |
| Y17             | 1888.85          | 1888.843      | -3.6             |
| Y18             | 1989.897         | 1989.894      | -1.7             |
| Y19             | 2086.95          | 2086.951      | 0.6              |

Repeat 45 pTyr1 peak:

Y SLP T L S L P L T L S L P L T L S L P L T L S L P K

| Identified Ions | Theoretical Mass | Observed Mass | Mass Error (ppm) |
|-----------------|------------------|---------------|------------------|
| Y2              | 243.1583         | 243.1583      | 0.2              |
| B2              | 250.0954         | 250.0955      | 0.7              |
| C2              | 267.1217         | 267.122       | 1.2              |
| Z3              | 314.1716         | 314.1718      | 0.8              |
| Y3              | 330.1903         | 330.1903      | -0.2             |
| Z4              | 415.2192         | 415.219       | -0.7             |
| B4              | 448.1958         | 448.196       | 0.4              |
| Y5              | 528.2908         | 528.291       | 0.4              |
| Z6              | 613.3197         | 613.3191      | -1.0             |
| Y6              | 629.3384         | 629.339       | 0.9              |
| B7              | 733.3283         | 733.3289      | 0.9              |
| C7              | 750.3546         | 750.3558      | 1.6              |
| Y7              | 872.3681         | 872.3684      | 0.3              |
| B8              | 896.3916         | 896.3917      | 0.1              |
| Z8              | 955.4177         | 955.4227      | 5.2              |
| A9              | 955.4287         | 955.4227      | -6.3             |
| Y8              | 971.4365         | 971.4369      | 0.4              |
| B9              | 983.4236         | 983.4247      | 1.1              |
| X8              | 997.4158         | 997.4153      | -0.4             |
| C9              | 1000.45          | 1000.449      | -1.4             |
| Y9              | 1068.489         | 1068.491      | 1.5              |
| Y10             | 1155.521         | 1155.523      | 1.3              |
| B11             | 1181.524         | 1181.524      | -0.2             |
| Z11             | 1240.55          | 1240.554      | 3.1              |
| A12             | 1240.561         | 1240.554      | -8.8             |
| Y11             | 1256.569         | 1256.567      | -1.7             |
| B12             | 1268.556         | 1268.556      | -0.1             |
| Y12             | 1353.622         | 1353.623      | 0.6              |
| Y13             | 1440.654         | 1440.656      | 1.7              |
| Y14             | 1603.717         | 1603.719      | 1.2              |
| B15             | 1707.707         | 1707.711      | 2.6              |
| Y16             | 1801.818         | 1801.819      | 0.6              |
| Y18             | 1989.897         | 1989.895      | -1.3             |
| Y19             | 2086.95          | 2086.951      | 0.3              |

E) Repeat 46/48 pTyr1 peak:

Y L S L P L T L S L P L T L S L P L T L S L P K

| Identified Ions | Theoretical Mass | Observed Mass | Mass Error (ppm) |
|-----------------|------------------|---------------|------------------|
| Y2              | 243.1583         | 243.1584      | 0.4              |
| X+2             | 270.1454         | 270.1459      | 2.0              |
| Y3              | 330.1903         | 330.1904      | 0.4              |
| A3              | 399.1195         | 399.1199      | 0.9              |
| Z4              | 415.2192         | 415.2189      | -0.7             |
| B4              | 528.1621         | 528.1625      | 0.8              |
| Y5              | 528.2908         | 528.2911      | 0.7              |
| Z6              | 599.304          | 599.3043      | 0.5              |
| Y6              | 615.3228         | 615.3231      | 0.5              |
| X6              | 641.3021         | 641.3034      | 2.0              |
| X7              | 804.3654         | 804.366       | 0.8              |
| B7              | 813.2946         | 813.2967      | 2.6              |
| Z8              | 863.415          | 863.4151      | 0.1              |
| Y8              | 879.4338         | 879.4344      | 0.7              |
| X8              | 905.4131         | 905.4146      | 1.7              |
| A8              | 948.363          | 948.3628      | -0.3             |
| B8              | 976.3579         | 976.3642      | 6.4              |
| Y9              | 976.4866         | 976.4871      | 0.5              |
| B9              | 1063.39          | 1063.392      | 2.2              |
| Y10             | 1063.519         | 1063.518      | -0.6             |
| Z11             | 1148.548         | 1148.549      | 1.3              |
| Y11             | 1164.566         | 1164.566      | -0.3             |
| X+11            | 1191.553         | 1191.552      | -1.5             |
| Y12             | 1261.619         | 1261.62       | 0.6              |
| Z13             | 1332.632         | 1332.637      | 3.3              |
| B12             | 1348.522         | 1348.52       | -1.8             |
| Y13             | 1348.651         | 1348.651      | -0.1             |

Repeat 47/49 pTyr1 peak:

Y L S L P L T L S L P L T L S L P L T L S L P K

| Identified Ions | Theoretical Mass | Observed Mass | Mass Error (ppm) |
|-----------------|------------------|---------------|------------------|
| Y2              | 243.1583         | 243.1582      | -0.2             |
| C2              | 267.1217         | 267.1219      | 1.1              |
| Y5              | 528.2908         | 528.2907      | 0.0              |
| Y6              | 615.3228         | 615.3231      | 0.6              |
| Y7              | 858.3524         | 858.3531      | 0.8              |
| X7              | 884.3317         | 884.3324      | 0.8              |
| Z8              | 943.3814         | 943.3824      | 1.1              |
| Y8              | 959.4001         | 959.4012      | 1.1              |
| X8              | 985.3794         | 985.3803      | 0.9              |
| C8              | 993.3842         | 993.3841      | -0.2             |
| A+9             | 1036.403         | 1036.404      | 0.9              |
| Y9              | 1056.453         | 1056.454      | 1.2              |
| Y10             | 1143.485         | 1143.486      | 0.5              |
| Y11             | 1244.533         | 1244.535      | 1.7              |
| X11             | 1270.512         | 1270.513      | 0.6              |
| A12             | 1320.528         | 1320.532      | 3.1              |
| Y12             | 1341.585         | 1341.587      | 0.9              |
| Y13             | 1428.617         | 1428.618      | 0.6              |

**F) Repeat 50 pTyr1 peak:**

□ G S T V L S L P T L S L P G V L S L P T L S L P T V L S L L L T L S L P A L I 25  
 26 L S L P D D L S D E E N .

| Identified Ions | Theoretical Mass | Observed Mass | Mass Error (ppm) |
|-----------------|------------------|---------------|------------------|
| A4              | 460.1359         | 460.1405      | 10.0             |
| B4              | 488.1308         | 488.1312      | 0.9              |
| C4              | 505.1571         | 505.1614      | 8.4              |
| Y4              | 505.1656         | 505.1614      | -8.4             |
| Y5              | 592.1976         | 592.1977      | 0.1              |
| B7              | 773.2633         | 773.2644      | 1.4              |
| B8              | 860.2953         | 860.2967      | 1.6              |
| Y8              | 919.3043         | 919.305       | 0.8              |
| Y9              | 1006.336         | 1006.337      | 0.7              |
| C10             | 1031.396         | 1031.399      | 2.8              |
| Y10             | 1119.42          | 1119.418      | -1.9             |
| B11             | 1177.433         | 1177.434      | 1.3              |
| B12             | 1264.465         | 1264.465      | 0.1              |
| Y12             | 1287.51          | 1287.512      | 1.1              |
| Y13             | 1374.542         | 1374.545      | 1.9              |
| B14             | 1462.565         | 1462.566      | 0.4              |
| Y14             | 1475.59          | 1475.594      | 2.4              |
| Y15             | 1588.674         | 1588.674      | 0.2              |
| Y16             | 1675.706         | 1675.706      | 0.1              |
| C17             | 1764.724         | 1764.726      | 1.0              |
| B19             | 1997.793         | 1997.793      | 0.1              |
| Y19             | 2036.87          | 2036.864      | -2.8             |
| Y20             | 2123.902         | 2123.902      | 0.1              |
| B21             | 2211.925         | 2211.925      | 0.2              |
| Y22             | 2322.002         | 2322.004      | 0.6              |
| Y23             | 2409.034         | 2409.022      | -5.2             |
| B24             | 2467.047         | 2467.053      | 2.6              |
| A25             | 2552.136         | 2552.137      | 0.4              |
| B25             | 2580.131         | 2580.135      | 1.4              |
| B26             | 2667.163         | 2667.182      | 7.1              |
| Y26             | 2726.172         | 2726.174      | 0.6              |
| Y-29            | 3010.297         | 3010.301      | 1.3              |
| C30             | 3098.328         | 3098.349      | 7.0              |
| Y30             | 3098.336         | 3098.349      | 4.2              |

**Repeat 51 pTyr1 peak:**

□ G S T V L S L P T L S L P G V L S L P T L S L P T V L S L L L T L S L P A L I 25  
 26 L S L P D D L S D E E N .

| Identified Ions | Theoretical Mass | Observed Mass | Mass Error (ppm) |
|-----------------|------------------|---------------|------------------|
| B4              | 408.1645         | 408.1648      | 0.8              |
| B5              | 495.1965         | 495.197       | 0.9              |
| Y6              | 707.2246         | 707.225       | 0.5              |
| B8              | 780.329          | 780.3304      | 1.8              |
| A9              | 849.3868         | 849.3866      | -0.3             |
| Y8              | 919.3043         | 919.3054      | 1.3              |
| C10             | 951.4295         | 951.4314      | 1.9              |
| Y9              | 1006.336         | 1006.337      | 1.1              |
| Y10             | 1119.42          | 1119.424      | 3.4              |
| B11             | 1177.433         | 1177.434      | 0.6              |
| B12             | 1264.465         | 1264.462      | -2.5             |
| Z12             | 1271.491         | 1271.503      | 8.9              |
| Y12             | 1287.51          | 1287.512      | 1.7              |
| Y13             | 1374.542         | 1374.545      | 1.9              |
| B14             | 1462.565         | 1462.569      | 2.3              |
| Y14             | 1475.59          | 1475.595      | 3.3              |
| B15             | 1549.597         | 1549.6        | 1.4              |
| Y15             | 1588.674         | 1588.675      | 0.5              |
| Y16             | 1675.706         | 1675.709      | 1.9              |
| C17             | 1764.724         | 1764.729      | 2.6              |
| B18             | 1910.761         | 1910.762      | 0.7              |
| Y19             | 2036.87          | 2036.87       | 0.2              |
| B20             | 2110.877         | 2110.874      | -1.6             |
| Y20             | 2123.902         | 2123.915      | 6.2              |
| B21             | 2211.925         | 2211.927      | 0.8              |
| B22             | 2298.957         | 2298.949      | -3.3             |
| Y22             | 2322.002         | 2322.011      | 3.5              |
| B24             | 2467.047         | 2467.049      | 0.9              |
| B25             | 2580.131         | 2580.135      | 1.6              |
| B26             | 2667.163         | 2667.16       | -0.9             |
| Y26             | 2806.138         | 2806.141      | 0.8              |
| Y27             | 2893.17          | 2893.167      | -1.2             |
| Y29             | 3091.271         | 3091.279      | 2.6              |

**Repeat 52 pTyr1 peak:**

□ G S T V L S L P T L S L P G V L S L P T L S L P T V L S L L L T L S L P A L I 25  
 26 L S L P D D L S D E E N .

| Identified Ions | Theoretical Mass | Observed Mass | Mass Error (ppm) |
|-----------------|------------------|---------------|------------------|
| A4              | 380.1696         | 380.1695      | -0.3             |
| B4              | 408.1645         | 408.1647      | 0.4              |
| B5              | 495.1965         | 495.1971      | 1.1              |
| Y6              | 707.2246         | 707.2257      | 1.5              |
| A+8             | 753.3419         | 753.338       | -5.2             |
| A9              | 849.3868         | 849.3858      | -1.2             |
| Y8              | 919.3043         | 919.3053      | 1.1              |
| B10             | 934.4032         | 934.4089      | 6.0              |
| C10             | 951.4295         | 951.4308      | 1.3              |
| Y9              | 1006.336         | 1006.337      | 0.9              |
| A+11            | 1070.479         | 1070.48       | 0.5              |
| B11             | 1097.467         | 1097.466      | -0.6             |
| Y10             | 1119.42          | 1119.422      | 1.5              |
| B12             | 1184.499         | 1184.499      | 0.3              |
| A+13            | 1254.564         | 1254.561      | -2.9             |
| Y12             | 1287.51          | 1287.512      | 1.4              |
| C13             | 1298.578         | 1298.579      | 1.3              |
| Y13             | 1374.542         | 1374.546      | 2.5              |
| B14             | 1382.599         | 1382.602      | 2.1              |
| A+15            | 1442.644         | 1442.648      | 2.6              |
| B15             | 1469.631         | 1469.634      | 1.8              |
| Y14             | 1475.59          | 1475.595      | 3.3              |
| Y15             | 1588.674         | 1588.674      | 0.3              |
| Y16             | 1675.706         | 1675.71       | 2.5              |
| B18             | 1910.761         | 1910.768      | 3.8              |
| B20             | 2110.877         | 2110.881      | 1.9              |
| Y19             | 2116.836         | 2116.836      | 0.2              |
| Y20             | 2203.868         | 2203.867      | -0.7             |
| B21             | 2211.925         | 2211.928      | 1.2              |
| B22             | 2298.957         | 2298.961      | 1.7              |
| Y22             | 2401.969         | 2401.972      | 1.5              |
| B24             | 2467.047         | 2467.052      | 2.1              |
| Y23             | 2489.001         | 2489.008      | 2.8              |
| B25             | 2580.131         | 2580.135      | 1.5              |
| B26             | 2667.163         | 2667.168      | 1.9              |
| Y26             | 2806.138         | 2806.141      | 1.0              |
| Y27             | 2893.17          | 2893.178      | 2.6              |
| Y29             | 3091.271         | 3091.276      | 1.6              |
| Y30             | 3178.303         | 3178.314      | 3.6              |

**Table S3.** Identified ions in UVPD-MS analysis of singly phosphorylated peaks from ABL1 treated 3xWT, 3xS7E Mid and Sp, and 3xS2E Mid substrates (Fig. 3). The phosphorylated Tyr1 sites were shown in blue boxes.

**A) 3xWT Repeat #1 pTyr1 peak:**

11 G P G S G M L S P L S V S L P T L S L P S I V L S L P T L S L P S I V L S 25  
26 P T

| Identified Ions | Theoretical Mass | Observed Mass | Mass Error (ppm) |
|-----------------|------------------|---------------|------------------|
| Y3              | 303.143          | 303.143       | -1.7             |
| B6              | 486.19           | 486.189       | -2.1             |
| B7              | 573.222          | 573.222       | 0.2              |
| Y6              | 650.291          | 650.29        | -1.7             |
| Y7              | 737.323          | 737.322       | -1.1             |
| Y9              | 935.424          | 935.423       | -0.5             |
| B10             | 1000.34          | 1000.33       | -3.1             |
| Y10             | 1022.46          | 1022.45       | -1.6             |
| B13             | 1285.47          | 1285.47       | -0.4             |
| Y13             | 1369.6           | 1369.6        | -1.0             |
| B14             | 1372.5           | 1372.5        | -1.5             |
| Y14             | 1456.64          | 1456.63       | -3.3             |
| C16             | 1573.61          | 1573.61       | -0.5             |
| Y16             | 1654.74          | 1654.73       | -1.8             |
| B17             | 1719.65          | 1719.65       | -0.5             |
| Y17             | 1741.77          | 1741.77       | -1.7             |
| B18             | 1806.68          | 1806.68       | -2.2             |
| B20             | 2004.78          | 2004.78       | -1.4             |
| Z19             | 2055.81          | 2055.79       | -8.5             |
| Y20             | 2168.88          | 2168.88       | -0.8             |
| Y21             | 2255.92          | 2255.9        | -5.3             |
| C23             | 2292.92          | 2292.91       | -5.8             |
| B24             | 2438.96          | 2438.96       | -0.3             |
| B25             | 2525.99          | 2525.99       | -1.2             |

**3xWT Repeat #2 pTyr1 peak:**

11 G P G S G M L S P L S V L S P T L S L P S I V L S P T L S L P S I V L S 25  
26 P T

| Identified Ions | Theoretical Mass | Observed Mass | Mass Error (ppm) |
|-----------------|------------------|---------------|------------------|
| Y3              | 303.143          | 303.143       | -1.5             |
| B6              | 486.19           | 486.189       | -1.8             |
| B7              | 573.222          | 573.221       | -0.5             |
| Y6              | 650.291          | 650.29        | -1.7             |
| Y7              | 737.323          | 737.323       | -0.7             |
| C9              | 774.333          | 774.332       | -0.9             |
| B10             | 920.37           | 920.369       | -1.5             |
| Y9              | 935.424          | 935.424       | -0.2             |
| Y10             | 1022.46          | 1022.46       | -0.7             |
| B13             | 1205.5           | 1205.5        | -2.1             |
| B14             | 1292.53          | 1292.53       | -0.5             |
| Y13             | 1449.57          | 1449.57       | -1.1             |
| Y14             | 1536.6           | 1536.6        | -2.6             |
| B17             | 1719.65          | 1719.65       | 0.7              |
| B18             | 1806.68          | 1806.69       | 3.1              |
| Y17             | 1821.74          | 1821.73       | -0.8             |
| B20             | 2004.78          | 2004.79       | 1.8              |
| B21             | 2091.81          | 2091.81       | -1.5             |
| Y21             | 2255.92          | 2255.91       | -2.6             |
| C23             | 2292.92          | 2292.9        | -8.7             |
| B24             | 2438.96          | 2438.97       | 2.3              |
| B25             | 2525.99          | 2525.99       | -2.7             |

**3xWT Repeat #3 pTyr1 peak:**

11 G L P G S G M L S P L S I V L S L P T L S L P S I V L S L P T L S L P S I V L S 25  
26 P T

| Identified Ions | Theoretical Mass | Observed Mass | Mass Error (ppm) |
|-----------------|------------------|---------------|------------------|
| C6              | 503.216          | 503.214       | -4.7             |
| A+8             | 643.287          | 643.289       | 2.6              |
| C8              | 687.301          | 687.301       | 0.0              |
| Y6              | 730.258          | 730.256       | -1.5             |
| B9              | 757.307          | 757.306       | -0.5             |
| C9              | 774.333          | 774.332       | -0.5             |
| Y7              | 817.29           | 817.289       | -0.4             |
| Y8              | 918.337          | 918.334       | -3.4             |
| B10             | 920.37           | 920.368       | -2.5             |
| C10             | 937.396          | 937.402       | 6.4              |
| A11             | 979.407          | 979.403       | -3.6             |
| B11             | 1007.4           | 1007.4        | -2.5             |
| Y9              | 1015.39          | 1015.39       | -1.2             |
| Y10             | 1102.42          | 1102.42       | -0.7             |
| B13             | 1205.5           | 1205.5        | -1.5             |
| C13             | 1222.53          | 1222.52       | -7.7             |
| Y11             | 1265.49          | 1265.5        | 8.0              |
| B14             | 1292.53          | 1292.54       | 0.4              |
| Y13             | 1449.57          | 1449.57       | -1.2             |
| B16             | 1476.62          | 1476.62       | 1.2              |
| C16             | 1493.65          | 1493.65       | 0.0              |
| Y14             | 1536.6           | 1536.6        | -1.4             |
| B17             | 1639.68          | 1639.68       | -1.4             |
| B18             | 1726.71          | 1726.71       | -0.8             |
| Y16             | 1734.7           | 1734.7        | -1.2             |
| Z17             | 1805.72          | 1805.72       | 0.4              |
| Y17             | 1821.74          | 1821.73       | -1.2             |
| B20             | 1924.82          | 1924.82       | 0.8              |
| Y18             | 1984.8           | 1984.81       | 6.8              |
| B21             | 2011.85          | 2011.85       | -1.2             |
| Y21             | 2255.92          | 2255.91       | -2.1             |
| B24             | 2438.96          | 2438.96       | -0.6             |
| B25             | 2525.99          | 2526          | 1.0              |
| Y-26            | 2684.08          | 2684.07       | -1.4             |



**B) 3xS7E Mid Rep. #2 pTyr1 peak: 3xS7E Mid Rep. #3 pTyr1 peak:**

10 G P G S G M L S I P S I Y L S I P T L S I P E I Y L S I P T L S I P S I Y L S 25  
20] P T

| Identified Ions | Theoretical Mass | Observed Mass | Mass Error (ppm) |
|-----------------|------------------|---------------|------------------|
| Y3              | 303.143          | 303.143       | -1.2             |
| B6              | 486.19           | 486.189       | -1.0             |
| B7              | 573.222          | 573.222       | 0.0              |
| Y6              | 650.291          | 650.29        | -1.1             |
| Y7              | 737.323          | 737.326       | 3.5              |
| C9              | 774.333          | 774.333       | 0.0              |
| B10             | 920.37           | 920.369       | -0.8             |
| Y9              | 935.424          | 935.424       | 0.0              |
| B11             | 1007.4           | 1007.4        | -0.8             |
| Y10             | 1022.46          | 1022.46       | -0.6             |
| B13             | 1205.5           | 1205.5        | -0.2             |
| Y11             | 1265.49          | 1265.49       | 6.0              |
| B14             | 1292.53          | 1292.54       | 0.2              |
| Y13             | 1491.58          | 1491.58       | -0.9             |
| B16             | 1518.63          | 1518.63       | -1.9             |
| Y14             | 1578.61          | 1578.61       | -0.6             |
| B17             | 1761.66          | 1761.66       | 0.6              |
| Y16             | 1776.71          | 1776.71       | -1.3             |
| B18             | 1848.69          | 1848.69       | -0.5             |
| Y17             | 1863.75          | 1863.74       | -1.3             |
| B20             | 2046.79          | 2046.79       | -3.1             |
| B21             | 2133.82          | 2133.82       | -2.1             |
| Y20             | 2210.89          | 2210.89       | -0.1             |
| Y21             | 2297.93          | 2297.93       | 2.0              |
| C23             | 2334.94          | 2334.94       | 0.2              |
| B24             | 2480.97          | 2480.97       | -1.5             |
| B25             | 2568             | 2568.01       | 1.0              |
| X+26            | 2754.08          | 2754.1        | 7.5              |

10 G P G S G M L S I P S I Y L S I P T L S I P E I Y L S I P T L S I P S I Y L S 25  
20] P T

| Identified Ions | Theoretical Mass | Observed Mass | Mass Error (ppm) |
|-----------------|------------------|---------------|------------------|
| Y3              | 303.143          | 303.143       | -1.0             |
| B6              | 486.19           | 486.189       | -1.5             |
| B7              | 573.222          | 573.221       | -0.9             |
| Y6              | 730.258          | 730.257       | -1.2             |
| B9              | 757.307          | 757.307       | 0.8              |
| C9              | 774.333          | 774.333       | 0.3              |
| Y7              | 817.29           | 817.289       | -0.4             |
| B10             | 920.37           | 920.369       | -0.6             |
| A+11            | 980.415          | 980.407       | -8.4             |
| Y9              | 1015.39          | 1015.39       | -0.9             |
| Y10             | 1102.42          | 1102.42       | -0.4             |
| B13             | 1205.5           | 1205.5        | 0.6              |
| B14             | 1292.53          | 1292.54       | 0.4              |
| Y13             | 1491.58          | 1491.58       | -1.2             |
| B16             | 1518.63          | 1518.63       | 0.9              |
| C16             | 1535.66          | 1535.66       | -0.5             |
| Y14             | 1578.61          | 1578.61       | -0.9             |
| B17             | 1681.69          | 1681.69       | -0.4             |
| B18             | 1768.73          | 1768.72       | -3.1             |
| Y16             | 1776.71          | 1776.71       | -0.3             |
| Z17             | 1847.73          | 1847.74       | 7.1              |
| Y17             | 1863.75          | 1863.74       | -0.8             |
| B20             | 1966.83          | 1966.83       | 0.7              |
| B21             | 2053.86          | 2053.86       | -1.2             |
| Y20             | 2210.89          | 2210.89       | -1.3             |
| Y21             | 2297.93          | 2297.93       | -0.3             |
| B24             | 2480.97          | 2480.97       | -2.0             |
| B25             | 2568             | 2568.01       | 1.0              |

**C) 3xS7E Sp Rep. #1 pTyr1 peak: 3xS7E Sp Rep. #2 pTyr1 peak: 3xS7E Sp Rep. #3 pTyr1 peak:**

10 G P G S G M L S I P E I Y L S I P T L S I P S I Y L S I P T L S I P E I Y L S 25  
20] P T

| Identified Ions | Theoretical Mass | Observed Mass | Mass Error (ppm) |
|-----------------|------------------|---------------|------------------|
| Y3              | 303.143          | 303.143       | -1.3             |
| Y4              | 466.206          | 466.206       | -1.3             |
| B6              | 486.19           | 486.189       | -1.4             |
| B7              | 573.222          | 573.221       | -0.5             |
| Y6              | 692.302          | 692.301       | -1.2             |
| Y7              | 779.334          | 779.333       | -0.8             |
| Y9              | 977.434          | 977.433       | -1.1             |
| B10             | 1042.35          | 1042.34       | -2.8             |
| Y10             | 1064.47          | 1064.47       | -1.1             |
| B11             | 1129.38          | 1129.38       | -1.3             |
| Y11             | 1227.53          | 1227.53       | -0.3             |
| B13             | 1327.48          | 1327.48       | -0.2             |
| Y13             | 1411.61          | 1411.61       | -0.4             |
| B14             | 1414.51          | 1414.51       | -3.5             |
| Y14             | 1498.65          | 1498.65       | -1.2             |
| C16             | 1615.62          | 1615.62       | -0.5             |
| B17             | 1761.66          | 1761.66       | -0.4             |
| Y17             | 1783.78          | 1783.78       | -1.3             |
| B18             | 1848.69          | 1848.69       | -0.7             |
| B21             | 2133.82          | 2133.82       | -0.9             |
| Y20             | 2252.9           | 2252.9        | -1.6             |
| Y21             | 2339.94          | 2339.94       | 0.2              |
| B23             | 2359.92          | 2359.92       | 0.4              |
| C23             | 2376.95          | 2376.93       | -6.3             |
| B24             | 2522.98          | 2522.98       | -0.4             |
| B25             | 2610.02          | 2610.02       | 0.5              |

10 G P G S G M L S I P E I Y L S I P T L S I P S I Y L S I P T L S I P E I Y L S 25  
20] P T

| Identified Ions | Theoretical Mass | Observed Mass | Mass Error (ppm) |
|-----------------|------------------|---------------|------------------|
| Y3              | 303.143          | 303.143       | -1.1             |
| B6              | 486.19           | 486.189       | -1.1             |
| Y6              | 692.302          | 692.301       | -0.7             |
| Y7              | 779.334          | 779.333       | -0.8             |
| A10             | 934.386          | 934.384       | -1.5             |
| B10             | 962.38           | 962.379       | -1.2             |
| Y9              | 977.434          | 977.434       | -0.3             |
| B11             | 1049.41          | 1049.41       | -2.2             |
| Y10             | 1064.47          | 1064.47       | -0.4             |
| B13             | 1247.51          | 1247.51       | -0.5             |
| Y11             | 1307.5           | 1307.51       | 9.0              |
| B14             | 1334.55          | 1334.55       | -0.1             |
| Y-13            | 1490.57          | 1490.57       | -0.1             |
| Y13             | 1491.58          | 1491.58       | -0.4             |
| B16             | 1518.63          | 1518.63       | 2.5              |
| C16             | 1535.66          | 1535.66       | 1.3              |
| Y14             | 1578.61          | 1578.61       | -1.6             |
| B17             | 1761.66          | 1761.66       | 1.1              |
| Y16             | 1776.71          | 1776.71       | 0.0              |
| B18             | 1848.69          | 1848.7        | 2.6              |
| Y17             | 1863.75          | 1863.74       | -0.7             |
| B20             | 2046.79          | 2046.79       | -0.1             |
| B21             | 2133.82          | 2133.82       | -1.0             |
| Y20             | 2252.9           | 2252.89       | -5.8             |
| Y21             | 2339.94          | 2339.93       | -1.8             |
| B23             | 2359.92          | 2359.93       | 3.0              |

10 G P G S G M L S I P E I Y L S I P T L S I P S I Y L S I P T L S I P E I Y L S 25  
20] P T

| Identified Ions | Theoretical Mass | Observed Mass | Mass Error (ppm) |
|-----------------|------------------|---------------|------------------|
| Y3              | 303.143          | 303.143       | -1.4             |
| B6              | 486.19           | 486.189       | -0.8             |
| B7              | 573.222          | 573.222       | -0.2             |
| Y6              | 772.268          | 772.267       | -1.5             |
| B9              | 799.317          | 799.321       | 4.5              |
| Y7              | 859.3            | 859.299       | -0.9             |
| A10             | 934.386          | 934.386       | 0.0              |
| B10             | 962.38           | 962.378       | -2.2             |
| B11             | 1049.41          | 1049.41       | -2.7             |
| Y9              | 1057.4           | 1057.4        | -1.2             |
| Y10             | 1144.43          | 1144.43       | -0.7             |
| B13             | 1247.51          | 1247.51       | -0.6             |
| B14             | 1334.55          | 1334.54       | -1.0             |
| Y13             | 1491.58          | 1491.58       | -1.4             |
| B16             | 1518.63          | 1518.63       | 2.1              |
| C16             | 1535.66          | 1535.66       | 0.5              |
| Y14             | 1578.61          | 1578.61       | -0.3             |
| B17             | 1681.69          | 1681.69       | -1.3             |
| B18             | 1768.73          | 1768.72       | -1.0             |
| Y16             | 1776.71          | 1776.71       | -1.1             |
| Y17             | 1863.75          | 1863.74       | -1.4             |
| B20             | 1966.83          | 1966.83       | 2.0              |
| B21             | 2053.86          | 2053.85       | -1.8             |
| Y20             | 2252.9           | 2252.89       | -8.2             |
| Y21             | 2339.94          | 2339.94       | -0.5             |
| B24             | 2522.98          | 2522.98       | -0.4             |
| B25             | 2610.02          | 2610.01       | -0.3             |

D) 3xS2E Mid Rep. #1 pTyr1 peak:

GLP G S G M S I P S V S I P T L S I P S I V L E L P T L S I P S I V L S 25  
20] P T

| Identified Ions | Theoretical Mass | Observed Mass | Mass Error (ppm) |
|-----------------|------------------|---------------|------------------|
| Y3              | 303.143          | 303.143       | -1.2             |
| B6              | 486.19           | 486.189       | -0.4             |
| Y6              | 650.291          | 650.291       | -0.8             |
| Y7              | 737.323          | 737.323       | -0.7             |
| Y9              | 935.424          | 935.423       | -0.4             |
| B10             | 1000.34          | 1000.33       | -2.2             |
| C10             | 1017.36          | 1017.36       | -1.5             |
| Y10             | 1064.47          | 1064.47       | -1.2             |
| B11             | 1087.37          | 1087.37       | -2.3             |
| B13             | 1285.47          | 1285.47       | 4.3              |
| B14             | 1372.5           | 1372.5        | -0.2             |
| Y13             | 1411.61          | 1411.61       | -0.5             |
| Y14             | 1498.65          | 1498.65       | 0.0              |
| C16             | 1573.61          | 1573.61       | -0.4             |
| B17             | 1719.65          | 1719.65       | -0.4             |
| Y17             | 1783.78          | 1783.78       | -1.2             |
| B18             | 1848.69          | 1848.69       | -0.9             |
| B20             | 2046.79          | 2046.79       | -0.2             |
| Z19             | 2097.82          | 2097.8        | -9.7             |
| B21             | 2133.82          | 2133.82       | -1.3             |
| Y20             | 2210.89          | 2210.89       | -1.8             |
| C23             | 2334.94          | 2334.93       | -0.5             |
| B24             | 2480.97          | 2480.97       | -0.3             |
| B25             | 2568             | 2568.01       | 0.8              |

3xS2E Mid Rep. #2 pTyr1 peak:

GLP G S G M S I P S S I V L S I P T L S I P S V L E L P T L S I P S I V L S 25  
20] P T

| Identified Ions | Theoretical Mass | Observed Mass | Mass Error (ppm) |
|-----------------|------------------|---------------|------------------|
| Y3              | 303.143          | 303.143       | -1.1             |
| B6              | 486.19           | 486.189       | -1.4             |
| B7              | 573.222          | 573.221       | -0.5             |
| Y6              | 650.291          | 650.291       | -1.1             |
| Y7              | 737.323          | 737.328       | 6.4              |
| C9              | 774.333          | 774.333       | -0.1             |
| B10             | 920.37           | 920.369       | -1.0             |
| Y9              | 935.424          | 935.424       | 0.1              |
| B11             | 1007.4           | 1007.4        | -1.0             |
| Y10             | 1064.47          | 1064.46       | -1.8             |
| B13             | 1205.5           | 1205.5        | 0.3              |
| B14             | 1292.53          | 1292.54       | 0.7              |
| Y13             | 1491.58          | 1491.58       | -0.2             |
| Y14             | 1578.61          | 1578.61       | -1.0             |
| Y16             | 1776.71          | 1776.71       | -0.4             |
| B18             | 1848.69          | 1848.69       | -0.5             |
| Y17             | 1863.75          | 1863.74       | -0.8             |
| B20             | 2046.79          | 2046.79       | 0.1              |
| Y20             | 2210.89          | 2210.89       | -0.2             |
| Y21             | 2297.93          | 2297.93       | 2.6              |
| C23             | 2334.94          | 2334.93       | -0.9             |
| B24             | 2480.97          | 2480.97       | -1.4             |
| B25             | 2568             | 2568.01       | 0.5              |

3xS2E Mid Rep. #3 pTyr1 peak:

GLP G S G M S I P S S I V L S I P T L S I P S I V L E L P T L S I P S I V L S 25  
20] P T

| Identified Ions | Theoretical Mass | Observed Mass | Mass Error (ppm) |
|-----------------|------------------|---------------|------------------|
| Y3              | 303.143          | 303.143       | -1.2             |
| B6              | 486.19           | 486.189       | -0.6             |
| Y6              | 730.258          | 730.257       | -1.1             |
| B9              | 757.307          | 757.306       | -0.3             |
| C9              | 774.333          | 774.333       | 0.3              |
| Y7              | 817.29           | 817.289       | -0.5             |
| A10             | 892.375          | 892.368       | -7.9             |
| B10             | 920.37           | 920.368       | -1.8             |
| B11             | 1007.4           | 1007.4        | -2.2             |
| Y9              | 1015.39          | 1015.39       | 0.7              |
| Y9              | 1015.39          | 1015.39       | -0.9             |
| Y10             | 1144.43          | 1144.43       | -0.9             |
| B13             | 1205.5           | 1205.5        | -0.2             |
| A14             | 1264.54          | 1264.53       | -7.6             |
| B14             | 1292.53          | 1292.54       | 0.5              |
| Y11             | 1307.5           | 1307.5        | -0.4             |
| Y13             | 1491.58          | 1491.58       | -0.1             |
| Y14             | 1578.61          | 1578.61       | -2.3             |
| B17             | 1639.68          | 1639.68       | -1.6             |
| B18             | 1768.73          | 1768.72       | -1.6             |
| Y16             | 1776.71          | 1776.71       | -1.4             |
| Z17             | 1847.73          | 1847.74       | 6.5              |
| Y17             | 1863.75          | 1863.74       | -0.9             |
| B20             | 1966.83          | 1966.83       | 1.7              |
| Y18             | 2026.81          | 2026.8        | -3.9             |
| B21             | 2053.86          | 2053.86       | -0.7             |
| Y20             | 2210.89          | 2210.89       | 0.1              |
| Y21             | 2297.93          | 2297.93       | 0.2              |
| B24             | 2480.97          | 2480.97       | -1.8             |
| B25             | 2568             | 2568.01       | 0.4              |
| X26             | 2753.07          | 2753.09       | 5.2              |

**Table S4.** Identified ions in UVPD-MS analysis of singly phosphorylated peaks from ABL1 treated, GluC digested 26xS7E Sp CTD substrate (Fig. 3B and 3E-F). The phosphorylated Tyr1 sites were shown in blue boxes.

**A) 26xS7E Sp Glu7-pTyr1 peak:**

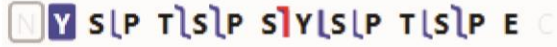

| Identified Ions | Theoretical Mass | Observed Mass | Mass Error (ppm) |
|-----------------|------------------|---------------|------------------|
| Y2              | 244.1059         | 244.1045      | -5.6             |
| Y3              | 331.1379         | 331.1363      | -5.0             |
| B4              | 528.1621         | 528.1595      | -4.9             |
| Y5              | 529.2384         | 529.2357      | -5.0             |
| B5              | 615.1942         | 615.1914      | -4.5             |
| Y6              | 616.2704         | 616.2675      | -4.8             |
| B7              | 799.279          | 799.2757      | -4.1             |
| C7              | 816.3053         | 816.3015      | -4.5             |
| Y9              | 963.4185         | 963.4164      | -2.3             |
| Y10             | 1050.451         | 1050.448      | -2.9             |
| Y12             | 1248.551         | 1248.54       | -8.9             |
| B12             | 1334.507         | 1334.5        | -5.4             |

**26xS7E Sp Ser7-pTyr1 peak:**

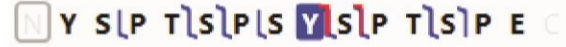

| Identified Ions | Theoretical Mass | Observed Mass | Mass Error (ppm) |
|-----------------|------------------|---------------|------------------|
| Y3              | 331.1379         | 331.1363      | -5.0             |
| B4              | 448.1958         | 448.1932      | -5.7             |
| Y5              | 529.2384         | 529.2358      | -5.0             |
| B5              | 535.2278         | 535.2252      | -4.9             |
| Y6              | 616.2704         | 616.2676      | -4.5             |
| Y-8             | 945.3243         | 945.329       | 5.0              |
| B8              | 962.3423         | 962.3377      | -4.8             |
| C8              | 979.3686         | 979.3641      | -4.6             |
| A9              | 1021.379         | 1021.376      | -3.1             |
| Y9              | 1043.385         | 1043.38       | -4.3             |
| B9              | 1049.374         | 1049.37       | -4.6             |
| C9              | 1066.401         | 1066.396      | -4.3             |
| Y10             | 1130.417         | 1130.412      | -4.3             |
| B11             | 1247.475         | 1247.471      | -3.2             |
| Y12             | 1328.517         | 1328.512      | -3.8             |
| B12             | 1334.507         | 1334.502      | -3.7             |

**B) 26xS7E Sp Glu7-pTyr1 peak:**

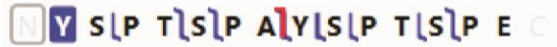

| Identified Ions | Theoretical Mass | Observed Mass | Mass Error (ppm) |
|-----------------|------------------|---------------|------------------|
| Y2              | 244.1059         | 244.1045      | -5.7             |
| Y3              | 331.1379         | 331.1352      | -8.4             |
| B4              | 528.1621         | 528.1593      | -5.3             |
| Y5              | 529.2384         | 529.2361      | -4.3             |
| B5              | 615.1942         | 615.1912      | -4.9             |
| Y6              | 616.2704         | 616.2676      | -4.6             |
| Y7              | 779.3337         | 779.3303      | -4.5             |
| B7              | 783.284          | 783.2802      | -4.8             |
| C7              | 800.3103         | 800.3068      | -4.4             |
| Y9              | 947.4236         | 947.4262      | 2.7              |
| Y10             | 1034.456         | 1034.453      | -2.9             |
| Y12             | 1232.556         | 1232.549      | -6.1             |
| B12             | 1318.512         | 1318.504      | -6.1             |

**26xS7E Sp Ala7-pTyr1 peak:**

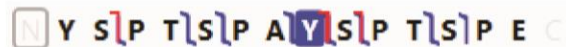

| Identified Ions | Theoretical Mass | Observed Mass | Mass Error (ppm) |
|-----------------|------------------|---------------|------------------|
| C2              | 267.1217         | 267.1205      | -4.3             |
| Y3              | 331.1379         | 331.1363      | -5.0             |
| B4              | 448.1958         | 448.1934      | -5.3             |
| Y5              | 529.2384         | 529.2358      | -4.8             |
| B5              | 535.2278         | 535.2255      | -4.3             |
| Y6              | 616.2704         | 616.2677      | -4.4             |
| B7              | 703.3177         | 703.3148      | -4.1             |
| Y7              | 859.3001         | 859.2951      | -5.8             |
| B8              | 946.3474         | 946.3425      | -5.1             |
| C8              | 963.3737         | 963.3703      | -3.5             |
| Y9              | 1027.39          | 1027.386      | -4.0             |
| B9              | 1033.379         | 1033.375      | -4.3             |
| C9              | 1050.406         | 1050.4        | -5.2             |
| Y10             | 1114.422         | 1114.417      | -4.9             |
| B11             | 1231.48          | 1231.474      | -5.1             |
| Y12             | 1312.522         | 1312.515      | -5.5             |
| B12             | 1318.512         | 1318.507      | -3.9             |

C) 26xS7E Sp Glu7-pTyr1 peak:

N Y S P T S P N Y S P T S P E C

| Identified Ions | Theoretical Mass | Observed Mass | Mass Error (ppm) |
|-----------------|------------------|---------------|------------------|
| Y2              | 244.1059         | 244.1045      | -5.8             |
| Y3              | 331.1379         | 331.1363      | -5.1             |
| B4              | 528.1621         | 528.1596      | -4.8             |
| Y5              | 529.2384         | 529.2355      | -5.4             |
| Y6              | 616.2704         | 616.2676      | -4.6             |
| B7              | 826.2899         | 826.2874      | -2.9             |
| C7              | 843.3162         | 843.3126      | -4.3             |
| Y9              | 990.4294         | 990.4281      | -1.3             |
| Y10             | 1077.461         | 1077.46       | -1.5             |
| Y12             | 1275.562         | 1275.567      | 3.7              |
| B12             | 1361.518         | 1361.511      | -4.6             |

26xS7E Sp Asn7-pTyr1 peak:

N Y S P T S P N Y S P T S P E C

| Identified Ions | Theoretical Mass | Observed Mass | Mass Error (ppm) |
|-----------------|------------------|---------------|------------------|
| C2              | 267.1217         | 267.1205      | -4.3             |
| Y3              | 331.1379         | 331.1363      | -4.9             |
| B4              | 448.1958         | 448.1935      | -5.2             |
| Y5              | 529.2384         | 529.2357      | -5.1             |
| B5              | 535.2278         | 535.2254      | -4.5             |
| Y6              | 616.2704         | 616.2677      | -4.3             |
| A7              | 718.3286         | 718.3263      | -3.2             |
| Y7              | 859.3001         | 859.2956      | -5.2             |
| Y-8             | 972.3352         | 972.3365      | 1.4              |
| B8              | 989.3532         | 989.3492      | -4.0             |
| Y9              | 1070.396         | 1070.391      | -4.7             |
| B9              | 1076.385         | 1076.38       | -4.4             |
| C9              | 1093.412         | 1093.405      | -5.9             |
| Y10             | 1157.428         | 1157.423      | -4.2             |
| B11             | 1274.486         | 1274.48       | -4.2             |
| B12             | 1361.518         | 1361.512      | -4.3             |

**Table S5.** Identified ions in UVPD-MS analysis of singly phosphorylated peaks from ABL1 treated 3xS7R Sp, Arg1810, and Cit1810 substrates (Fig. 5A and 5C/D). The phosphorylated Tyr1 sites were shown in blue boxes. Tables are split across pages due to size constraints.

**A) 3xS7R Sp Rep. #1 peak:**

11 G L P L G L S L G I M L S L P L R Y S L P L T L S L P L S L Y L S L P L T L S L P L R L Y S 25  
26 P L T C

| Identified Ions | Theoretical Mass | Observed Mass | Mass Error (ppm) |
|-----------------|------------------|---------------|------------------|
| A+6             | 459.2026         | 459.2029      | 0.7              |
| C6              | 503.216          | 503.2158      | -0.2             |
| Z5              | 606.2887         | 606.2895      | 1.4              |
| Y5              | 622.3075         | 622.3077      | 0.4              |
| A+8             | 643.2874         | 643.2869      | -0.7             |
| X5              | 648.2867         | 648.2875      | 1.1              |
| Y6              | 719.3602         | 719.3555      | -6.5             |
| A+9             | 799.3885         | 799.3857      | -3.5             |
| Y7              | 806.3923         | 806.3947      | 3.0              |
| Z8              | 891.4212         | 891.4214      | 0.3              |
| Y8              | 907.4399         | 907.4452      | 5.8              |
| X8              | 933.4192         | 933.4204      | 1.2              |
| Y9              | 1004.493         | 1004.495      | 2.3              |
| X+9             | 1031.48          | 1031.475      | -4.8             |
| A+10            | 1042.418         | 1042.418      | -0.2             |
| Z10             | 1075.506         | 1075.508      | 1.7              |
| C10             | 1086.432         | 1086.433      | 1.1              |
| Y10             | 1091.525         | 1091.528      | 2.7              |
| A+11            | 1129.45          | 1129.446      | -3.6             |
| A+12            | 1226.503         | 1226.505      | 1.3              |
| Y11             | 1254.588         | 1254.59       | 1.5              |
| C12             | 1270.516         | 1270.506      | -8.4             |
| X11             | 1280.567         | 1280.566      | -1.2             |
| A13             | 1326.543         | 1326.54       | -1.8             |
| B13             | 1354.538         | 1354.546      | 6.4              |
| X12             | 1367.599         | 1367.599      | -0.4             |
| C13             | 1371.564         | 1371.566      | 1.2              |
| A14             | 1413.575         | 1413.576      | 1.2              |
| B14             | 1441.57          | 1441.569      | -0.8             |
| A+15            | 1511.635         | 1511.636      | 0.4              |
| Y14             | 1525.705         | 1525.71       | 3.4              |
| C15             | 1555.649         | 1555.648      | -0.4             |
| B16             | 1625.655         | 1625.66       | 3.3              |
| Y15             | 1626.753         | 1626.745      | -4.6             |
| C16             | 1642.681         | 1642.683      | 1.2              |
| X15             | 1652.732         | 1652.729      | -1.9             |
| Y-16            | 1722.797         | 1722.801      | 2.2              |
| A17             | 1760.723         | 1760.727      | 2.5              |
| B17             | 1788.718         | 1788.724      | 3.3              |
| C17             | 1805.744         | 1805.749      | 2.5              |
| Y17             | 1810.837         | 1810.833      | -2.6             |
| A18             | 1847.755         | 1847.759      | 2.2              |
| B18             | 1875.75          | 1875.756      | 3.1              |
| A+19            | 1945.816         | 1945.813      | -1.3             |
| C19             | 1989.829         | 1989.834      | 2.7              |
| A20             | 2045.855         | 2045.862      | 3.1              |
| B20             | 2073.85          | 2073.866      | 7.6              |
| C20             | 2090.877         | 2090.874      | -1.2             |
| A21             | 2132.887         | 2132.895      | 3.8              |
| B21             | 2160.882         | 2160.896      | 6.3              |
| Z19             | 2193.949         | 2193.951      | 0.9              |

**3xS7R Sp Rep. #2 peak:**

11 G L P L G L S L G I M L S L P L R L Y S L P L T L S L P L S L Y S L P L T L S L P L R L Y S 25  
26 P L T C

| Identified Ions | Theoretical Mass | Observed Mass | Mass Error (ppm) |
|-----------------|------------------|---------------|------------------|
| A+6             | 459.2026         | 459.2033      | 1.6              |
| B6              | 486.1897         | 486.1899      | 0.4              |
| C6              | 503.216          | 503.2149      | -2.2             |
| A7              | 545.2268         | 545.2273      | 0.9              |
| Z5              | 606.2887         | 606.2886      | -0.1             |
| Y-5             | 621.2996         | 621.2965      | -5.1             |
| A+8             | 643.2874         | 643.2878      | 0.6              |
| X5              | 648.2867         | 648.2878      | 1.6              |
| X+5             | 649.2946         | 649.2916      | -4.6             |
| Y6              | 719.3602         | 719.3615      | 1.8              |
| A+9             | 799.3885         | 799.3899      | 1.8              |
| Y7              | 806.3923         | 806.3943      | 2.5              |
| B9              | 826.3756         | 826.3765      | 1.1              |
| X7              | 832.3715         | 832.3755      | 4.8              |
| Z8              | 891.4212         | 891.4209      | -0.3             |
| Y8              | 907.4399         | 907.4467      | 7.5              |
| X8              | 933.4192         | 933.4192      | -0.1             |
| A10             | 961.444          | 961.4451      | 1.1              |
| A+10            | 962.4518         | 962.4502      | -1.7             |
| Y-9             | 1003.485         | 1003.486      | 0.9              |
| Y9              | 1004.493         | 1004.492      | -0.3             |
| X+9             | 1031.48          | 1031.471      | -8.5             |
| A+11            | 1049.484         | 1049.483      | -0.4             |
| B11             | 1076.471         | 1076.473      | 1.6              |
| Y10             | 1091.525         | 1091.529      | 4.1              |
| A+12            | 1146.537         | 1146.532      | -3.6             |
| C12             | 1190.55          | 1190.551      | 0.6              |
| A13             | 1246.576         | 1246.586      | 7.9              |
| B13             | 1274.571         | 1274.565      | -4.8             |
| A14             | 1333.608         | 1333.61       | 0.9              |
| B14             | 1361.603         | 1361.606      | 2.2              |
| Y12             | 1421.586         | 1421.587      | 0.2              |
| A+15            | 1431.669         | 1431.669      | -0.2             |
| X12             | 1447.566         | 1447.571      | 3.5              |
| C15             | 1475.682         | 1475.684      | 1.3              |
| Y13             | 1518.639         | 1518.639      | 0.1              |
| B16             | 1545.688         | 1545.691      | 1.6              |
| Y14             | 1605.671         | 1605.675      | 2.3              |
| Y15             | 1706.719         | 1706.727      | 4.7              |
| A+17            | 1761.731         | 1761.733      | 1.1              |
| B17             | 1788.718         | 1788.726      | 4.8              |
| Y16             | 1803.772         | 1803.774      | 1.3              |
| A18             | 1847.755         | 1847.765      | 5.4              |
| Z17             | 1874.785         | 1874.793      | 4.4              |
| A+19            | 1945.816         | 1945.817      | 0.8              |
| C19             | 1989.829         | 1989.834      | 2.5              |
| A+20            | 2046.863         | 2046.873      | 4.6              |
| Y18             | 2053.867         | 2053.883      | 8.0              |
| B20             | 2073.85          | 2073.865      | 6.9              |

|      |          |          |      |      |          |          |      |
|------|----------|----------|------|------|----------|----------|------|
| Y19  | 2209.968 | 2209.972 | 1.9  | C20  | 2090.877 | 2090.88  | 1.6  |
| A+22 | 2230.948 | 2230.949 | 0.4  | A21  | 2132.887 | 2132.895 | 3.7  |
| X19  | 2235.947 | 2235.954 | 2.8  | B21  | 2160.882 | 2160.897 | 6.6  |
| Y-20 | 2306.013 | 2306.013 | 0.0  | Z19  | 2193.949 | 2193.956 | 2.8  |
| A23  | 2386.041 | 2386.041 | -0.2 | Y19  | 2209.968 | 2209.977 | 4.0  |
| Y21  | 2394.053 | 2394.055 | 1.0  | A+22 | 2230.948 | 2230.952 | 1.9  |
| X+21 | 2421.04  | 2421.038 | -0.7 | X19  | 2235.947 | 2235.957 | 4.3  |
| C23  | 2431.063 | 2431.059 | -1.6 | Y-20 | 2306.013 | 2306.015 | 0.9  |
| Y22  | 2525.093 | 2525.088 | -2.1 | A23  | 2386.041 | 2386.047 | 2.4  |
| A24  | 2549.105 | 2549.11  | 2.2  | Y21  | 2394.053 | 2394.056 | 1.5  |
| A+24 | 2550.112 | 2550.113 | 0.0  | X+21 | 2421.04  | 2421.045 | 2.0  |
| Y23  | 2582.115 | 2582.122 | 2.9  | C23  | 2431.063 | 2431.051 | -4.6 |
| C24  | 2594.126 | 2594.133 | 2.8  | Y22  | 2525.093 | 2525.1   | 2.5  |
| X23  | 2608.094 | 2608.106 | 4.7  | B24  | 2577.1   | 2577.115 | 6.2  |
| A+25 | 2637.144 | 2637.142 | -0.8 | C24  | 2594.126 | 2594.132 | 2.5  |
| B25  | 2664.132 | 2664.133 | 0.5  | X23  | 2608.094 | 2608.107 | 5.1  |
| Y-24 | 2668.139 | 2668.144 | 1.7  | A+25 | 2637.144 | 2637.142 | -0.9 |
| Y25  | 2726.168 | 2726.183 | 5.5  | B25  | 2664.132 | 2664.138 | 2.4  |
| A+26 | 2734.197 | 2734.203 | 2.2  | Y24  | 2669.147 | 2669.145 | -0.5 |
| X25  | 2752.148 | 2752.147 | -0.2 | Y25  | 2726.168 | 2726.18  | 4.4  |
| Y-26 | 2822.213 | 2822.229 | 5.5  | A+26 | 2734.197 | 2734.201 | 1.2  |

## B) Arg1810 Peptide Rep. #1 peak: Arg1810 Peptide Rep. #3 peak:

S[P]L[S]  Y[L]S[P]L[S]L[S]P[R]Y]T]P  Q[S]L[P]T]Y]T]P]S]S

| Identified Ions | Theoretical Mass | Observed Mass | Mass Error (ppm) |
|-----------------|------------------|---------------|------------------|
| Y4              | 390.1751         | 390.175       | -0.2             |
| A+4             | 487.1594         | 487.1583      | -2.3             |
| B4              | 514.1465         | 514.1471      | 1.2              |
| C4              | 531.1728         | 531.1736      | 1.5              |
| Y6              | 654.2861         | 654.2883      | 3.5              |
| A6              | 670.2364         | 670.2384      | 3.1              |
| A+6             | 671.2442         | 671.2436      | -0.8             |
| Y7              | 751.3388         | 751.3395      | 0.8              |
| B7              | 785.2633         | 785.2641      | 1.1              |
| C7              | 802.2896         | 802.2883      | -1.6             |
| A+8             | 845.3082         | 845.3027      | -6.5             |
| B8              | 872.2953         | 872.2978      | 2.9              |
| Y10             | 1063.482         | 1063.483      | 0.8              |
| A10             | 1097.454         | 1097.453      | -1.2             |
| B10             | 1125.449         | 1125.45       | 1.1              |
| C10             | 1142.476         | 1142.478      | 2.1              |
| A+11            | 1261.525         | 1261.522      | -2.9             |
| B11             | 1288.513         | 1288.513      | 0.3              |
| C11             | 1305.539         | 1305.539      | -0.1             |
| A12             | 1361.565         | 1361.569      | 2.9              |
| B12             | 1389.56          | 1389.559      | -0.9             |
| Y13             | 1483.694         | 1483.693      | -1.1             |
| X13             | 1509.674         | 1509.672      | -1.3             |
| Y14             | 1580.747         | 1580.75       | 1.6              |
| B14             | 1614.672         | 1614.672      | 0.0              |
| C14             | 1631.698         | 1631.712      | 8.7              |
| Y15             | 1667.779         | 1667.771      | -4.6             |
| B15             | 1701.704         | 1701.714      | 6.1              |
| Y16             | 1754.811         | 1754.811      | -0.1             |
| A+16            | 1771.769         | 1771.77       | 0.2              |
| X16             | 1780.79          | 1780.795      | 2.3              |
| C16             | 1815.783         | 1815.785      | 1.2              |

S[P]L[S]Y]S]P]S]S]P]R]Y]T]P]Q]S]P]T]  Y]T]P]S]S

| Identified Ions | Theoretical Mass | Observed Mass | Mass Error (ppm) |
|-----------------|------------------|---------------|------------------|
| Y4              | 390.1751         | 390.1752      | 0.2              |
| A4              | 406.1852         | 406.1854      | 0.3              |
| B4              | 434.1802         | 434.1804      | 0.5              |
| C4              | 451.2065         | 451.2068      | 0.8              |
| B5              | 521.2122         | 521.2127      | 1.0              |
| A+6             | 591.2779         | 591.2794      | 2.5              |
| B7              | 705.297          | 705.2969      | -0.1             |
| C7              | 722.3233         | 722.3232      | -0.1             |
| Y6              | 734.2524         | 734.2516      | -1.1             |
| A+8             | 765.3419         | 765.3366      | -6.9             |
| Y7              | 831.3052         | 831.3062      | 1.3              |
| A+9             | 862.3947         | 862.394       | -0.8             |
| Y8              | 918.3372         | 918.3376      | 0.4              |
| B10             | 1045.483         | 1045.482      | -0.4             |
| C10             | 1062.509         | 1062.507      | -2.0             |
| Y10             | 1143.449         | 1143.449      | 0.5              |
| A+11            | 1181.559         | 1181.558      | -0.8             |
| Y11             | 1244.496         | 1244.493      | -2.3             |
| A+12            | 1282.607         | 1282.605      | -1.1             |
| B12             | 1309.594         | 1309.595      | 1.0              |
| A13             | 1378.652         | 1378.646      | -4.2             |
| Y12             | 1407.56          | 1407.565      | 3.7              |
| A14             | 1506.71          | 1506.712      | 1.3              |
| B14             | 1534.705         | 1534.709      | 2.8              |
| C14             | 1551.732         | 1551.733      | 0.8              |
| Y13             | 1563.661         | 1563.669      | 5.6              |
| X+13            | 1590.648         | 1590.655      | 4.5              |
| A+15            | 1594.75          | 1594.747      | -2.2             |
| B15             | 1621.737         | 1621.739      | 1.1              |
| Y14             | 1660.713         | 1660.713      | -0.1             |
| C16             | 1735.816         | 1735.817      | 0.5              |
| Y15             | 1747.745         | 1747.753      | 4.6              |

|      |          |          |      |      |          |          |      |
|------|----------|----------|------|------|----------|----------|------|
| Y17  | 1851.864 | 1851.861 | -1.7 | Y16  | 1834.777 | 1834.793 | 8.5  |
| B17  | 1899.804 | 1899.809 | 2.8  | Y17  | 1931.83  | 1931.832 | 1.0  |
| C17  | 1916.83  | 1916.838 | 4.2  | Y18  | 2018.862 | 2018.862 | 0.1  |
| Y18  | 1938.896 | 1938.899 | 1.4  | X18  | 2044.842 | 2044.861 | 9.5  |
| A+18 | 2035.88  | 2035.878 | -1.2 | B18  | 2062.867 | 2062.876 | 4.2  |
| B18  | 2062.867 | 2062.872 | 2.3  | C18  | 2079.894 | 2079.896 | 0.9  |
| C18  | 2079.894 | 2079.896 | 1.0  | A+19 | 2136.928 | 2136.924 | -1.8 |
| A+19 | 2136.928 | 2136.923 | -2.3 | B19  | 2163.915 | 2163.918 | 1.2  |
| B19  | 2163.915 | 2163.917 | 1.1  | Y19  | 2181.926 | 2181.926 | 0.3  |
| A20  | 2232.973 | 2232.97  | -1.4 | Y20  | 2268.958 | 2268.963 | 2.4  |
| Y20  | 2268.958 | 2268.962 | 1.9  | Y21  | 2366.01  | 2366.012 | 0.7  |
| Y-21 | 2365.003 | 2365.004 | 0.6  |      |          |          |      |
| C21  | 2365.026 | 2365.004 | -9.4 |      |          |          |      |
| Y4   | 390.1751 | 390.175  | -0.2 |      |          |          |      |
| A+4  | 487.1594 | 487.1583 | -2.3 |      |          |          |      |
| B4   | 514.1465 | 514.1471 | 1.2  |      |          |          |      |

### C) Cit1810 Peptide Rep. #1 peak:

□ S P S Y | S | P | S | S | P | R | Y | T | P | Q | S | P | T | Y | T | P | S | S

| Identified Ions | Theoretical Mass | Observed Mass | Mass Error (ppm) |
|-----------------|------------------|---------------|------------------|
| A+4             | 487.1594         | 487.1579      | -3.0             |
| B4              | 514.1465         | 514.147       | 0.9              |
| C4              | 531.1728         | 531.1735      | 1.3              |
| Y5              | 553.2384         | 553.2387      | 0.6              |
| B5              | 601.1785         | 601.1786      | 0.1              |
| Y-6             | 653.2782         | 653.2822      | 6.1              |
| C6              | 715.2576         | 715.2578      | 0.3              |
| Y7              | 751.3388         | 751.3392      | 0.5              |
| B7              | 785.2633         | 785.2633      | 0.0              |
| C7              | 802.2896         | 802.2895      | -0.1             |
| Y8              | 838.3709         | 838.3701      | -0.9             |
| B8              | 872.2953         | 872.2961      | 0.9              |
| A+9             | 942.361          | 942.3583      | -2.9             |
| Y9              | 966.4294         | 966.4292      | -0.3             |
| C9              | 986.3744         | 986.3706      | -3.9             |
| Y10             | 1063.482         | 1063.483      | 0.3              |
| A+10            | 1099.446         | 1099.448      | 1.3              |
| B10             | 1126.433         | 1126.434      | 0.3              |
| C10             | 1143.46          | 1143.461      | 1.6              |
| Y11             | 1164.53          | 1164.533      | 2.3              |
| A+11            | 1262.509         | 1262.507      | -1.6             |
| B11             | 1289.497         | 1289.497      | 0.5              |
| C11             | 1306.523         | 1306.522      | -0.8             |
| Y12             | 1327.593         | 1327.6        | 5.1              |
| B12             | 1390.544         | 1390.545      | 0.3              |
| Y14             | 1581.731         | 1581.738      | 4.3              |
| B14             | 1615.656         | 1615.657      | 0.6              |
| C14             | 1632.682         | 1632.677      | -3.2             |
| Y15             | 1668.763         | 1668.769      | 3.8              |
| B15             | 1702.688         | 1702.687      | -0.2             |
| Y17             | 1852.848         | 1852.849      | 0.5              |
| C17             | 1917.814         | 1917.814      | -0.4             |
| Y18             | 1939.88          | 1939.88       | 0.2              |
| C18             | 2080.878         | 2080.87       | -3.8             |
| B19             | 2164.899         | 2164.893      | -2.8             |

### Cit1810 Peptide Rep. #2 peak:

□ S P S Y | S | P | S | S | P | R | Y | T | P | Q | S | P | T | Y | T | P | S | S

| Identified Ions | Theoretical Mass | Observed Mass | Mass Error (ppm) |
|-----------------|------------------|---------------|------------------|
| A4              | 406.1852         | 406.1854      | 0.4              |
| B4              | 434.1802         | 434.1803      | 0.4              |
| C4              | 451.2065         | 451.2068      | 0.7              |
| B5              | 521.2122         | 521.2125      | 0.6              |
| Y5              | 553.2384         | 553.2389      | 0.9              |
| A6              | 590.27           | 590.2737      | 6.3              |
| B7              | 705.297          | 705.2984      | 2.0              |
| C7              | 722.3233         | 722.3245      | 1.7              |
| Y7              | 751.3388         | 751.3394      | 0.8              |
| A+8             | 765.3419         | 765.3379      | -5.3             |
| B8              | 792.329          | 792.3292      | 0.2              |
| Y8              | 838.3709         | 838.3715      | 0.7              |
| A9              | 861.3868         | 861.3869      | 0.0              |
| C9              | 906.4081         | 906.4084      | 0.3              |
| Y9              | 966.4294         | 966.426       | -3.6             |
| A+10            | 1019.48          | 1019.471      | -8.5             |
| B10             | 1046.467         | 1046.472      | 4.8              |
| Y10             | 1063.482         | 1063.483      | 1.1              |
| C10             | 1063.493         | 1063.483      | -9.2             |
| Y11             | 1164.53          | 1164.535      | 4.3              |
| A+11            | 1262.509         | 1262.508      | -1.0             |
| B11             | 1289.497         | 1289.499      | 1.6              |
| C11             | 1306.523         | 1306.521      | -1.6             |
| A12             | 1362.549         | 1362.55       | 0.4              |
| B12             | 1390.544         | 1390.545      | 0.8              |
| Y12             | 1407.56          | 1407.562      | 1.4              |
| C12             | 1407.571         | 1407.562      | -6.4             |
| A+14            | 1588.668         | 1588.665      | -2.0             |
| B14             | 1615.656         | 1615.657      | 0.7              |
| C14             | 1632.682         | 1632.674      | -5.0             |
| Y14             | 1661.697         | 1661.697      | -0.3             |
| B15             | 1702.688         | 1702.69       | 1.6              |
| Y15             | 1748.729         | 1748.733      | 1.8              |
| B17             | 1900.788         | 1900.792      | 2.3              |
| C17             | 1917.814         | 1917.813      | -0.6             |
| Y17             | 1932.814         | 1932.817      | 1.6              |
| B19             | 2164.899         | 2164.901      | 1.1              |

### Cit1810 Peptide Rep. #3 peak:

□ S P S Y | S | P | S | S | P | R | Y | T | P | Q | S | P | T | Y | T | P | S | S

| Identified Ions | Theoretical Mass | Observed Mass | Mass Error (ppm) |
|-----------------|------------------|---------------|------------------|
| A4              | 406.1852         | 406.1853      | 0.2              |
| B4              | 434.1802         | 434.1801      | -0.1             |
| C4              | 451.2065         | 451.2065      | 0.1              |
| B7              | 705.297          | 705.2952      | -2.6             |
| C7              | 722.3233         | 722.3228      | -0.6             |
| B8              | 792.329          | 792.33        | 1.3              |
| Y7              | 831.3052         | 831.3062      | 1.3              |
| A9              | 861.3868         | 861.387       | 0.1              |
| C9              | 906.4081         | 906.4087      | 0.7              |
| Y8              | 918.3372         | 918.3375      | 0.3              |
| A10             | 1018.472         | 1018.469      | -3.4             |
| B10             | 1046.467         | 1046.474      | 7.1              |
| C10             | 1063.493         | 1063.494      | 0.8              |
| Y10             | 1143.449         | 1143.45       | 1.0              |
| A11             | 1181.535         | 1181.537      | 1.4              |
| B11             | 1209.53          | 1209.525      | -4.1             |
| Y11             | 1244.496         | 1244.498      | 1.3              |
| A+12            | 1283.591         | 1283.594      | 2.2              |
| B12             | 1310.578         | 1310.581      | 2.1              |
| Y12             | 1407.56          | 1407.557      | -2.0             |
| B14             | 1535.689         | 1535.692      | 1.8              |
| C14             | 1552.716         | 1552.707      | -5.7             |
| A15             | 1594.726         | 1594.716      | -6.2             |
| B15             | 1622.721         | 1622.724      | 1.4              |
| Y14             | 1661.697         | 1661.698      | 0.1              |
| Y15             | 1748.729         | 1748.732      | 1.2              |
| Y17             | 1932.814         | 1932.818      | 2.0              |
| B19             | 2164.899         | 2164.885      | -6.6             |
| B21             | 2348.984         | 2348.99       | 2.5              |

**Table S6.** Identified ions in UVPD-MS analysis of singly phosphorylated peaks from ABL1 treated 3xS7K Sp and 3xS7Q Mid/Sp substrates (Fig. 6A and 6C/D). The phosphorylated Tyr1 sites were shown in blue boxes. Tables are split across pages due to size constraints.

**A) 3xS7K Sp Rep. #1 peak:**

11 G|P|G S|G|M|S|P|K|**T**|S|P|T|S|P|S|Y|S|P|T|S|P|K|Y|S 25  
26]P]T C

| Identified Ions | Theoretical Mass | Observed Mass | Mass Error (ppm) |
|-----------------|------------------|---------------|------------------|
| Y3              | 303.143          | 303.1432      | 0.7              |
| A+6             | 459.2026         | 459.2028      | 0.6              |
| B6              | 486.1897         | 486.1896      | -0.1             |
| A+7             | 546.2346         | 546.2308      | -6.9             |
| Z5              | 578.2826         | 578.2824      | -0.3             |
| Y5              | 594.3013         | 594.3013      | 0.0              |
| A+8             | 643.2874         | 643.2882      | 1.4              |
| Y6              | 691.3541         | 691.355       | 1.3              |
| A+9             | 771.3823         | 771.3842      | 2.4              |
| Y7              | 778.3861         | 778.3885      | 3.1              |
| B9              | 798.3694         | 798.3678      | -2.1             |
| Y-8             | 878.426          | 878.42        | -6.9             |
| Y9              | 976.4866         | 976.4875      | 0.9              |
| A10             | 1013.404         | 1013.405      | 0.9              |
| A+10            | 1014.412         | 1014.412      | -0.3             |
| C10             | 1058.425         | 1058.429      | 3.1              |
| Y10             | 1063.519         | 1063.521      | 2.3              |
| A+11            | 1101.444         | 1101.441      | -2.5             |
| B11             | 1128.431         | 1128.432      | 0.8              |
| A+12            | 1198.497         | 1198.495      | -1.4             |
| Y11             | 1226.582         | 1226.586      | 3.7              |
| C12             | 1242.51          | 1242.517      | 5.8              |
| Y12             | 1313.614         | 1313.615      | 1.0              |
| B13             | 1326.532         | 1326.536      | 3.2              |
| X12             | 1339.593         | 1339.586      | -5.3             |
| C13             | 1343.558         | 1343.56       | 1.2              |
| Y13             | 1410.667         | 1410.668      | 0.8              |
| B14             | 1413.564         | 1413.563      | -0.2             |
| A+15            | 1483.629         | 1483.629      | 0.1              |
| Y14             | 1497.699         | 1497.702      | 2.2              |
| C15             | 1527.643         | 1527.645      | 1.5              |
| A16             | 1569.653         | 1569.655      | 1.2              |
| B16             | 1597.648         | 1597.654      | 3.4              |
| C16             | 1614.675         | 1614.676      | 1.1              |
| X+15            | 1625.734         | 1625.729      | -2.6             |
| Y-16            | 1694.791         | 1694.805      | 8.2              |
| A17             | 1732.717         | 1732.719      | 1.2              |
| B17             | 1760.712         | 1760.709      | -1.6             |
| C17             | 1777.738         | 1777.741      | 1.8              |
| Y17             | 1782.831         | 1782.826      | -3.2             |
| A+18            | 1820.757         | 1820.769      | 6.9              |
| B18             | 1847.744         | 1847.748      | 2.1              |
| A+19            | 1917.809         | 1917.811      | 0.9              |
| C19             | 1961.823         | 1961.826      | 1.5              |
| A20             | 2017.849         | 2017.861      | 5.6              |
| Y18             | 2025.861         | 2025.863      | 1.2              |
| B20             | 2045.844         | 2045.852      | 3.6              |
| A+21            | 2105.889         | 2105.892      | 1.3              |
| Z19             | 2137.937         | 2137.931      | -2.6             |
| Y19             | 2153.956         | 2153.962      | 2.8              |

**3xS7K Sp Rep. #2 peak:**

11 G|P|G S|G|M|S|P|K|Y|S|P|T|S|P|S|**Y**|S|P|T|S|P|K|Y|S 25  
26]P]T C

| Identified Ions | Theoretical Mass | Observed Mass | Mass Error (ppm) |
|-----------------|------------------|---------------|------------------|
| Y3              | 303.143          | 303.1433      | 0.8              |
| A+6             | 459.2026         | 459.2029      | 0.8              |
| B6              | 486.1897         | 486.1898      | 0.3              |
| C6              | 503.216          | 503.2162      | 0.5              |
| Z5              | 578.2826         | 578.2828      | 0.3              |
| Y5              | 594.3013         | 594.3021      | 1.3              |
| X5              | 620.2806         | 620.2812      | 0.9              |
| C8              | 687.3008         | 687.3012      | 0.7              |
| Y6              | 691.3541         | 691.3548      | 1.0              |
| A+9             | 771.3823         | 771.3865      | 5.4              |
| Y7              | 778.3861         | 778.3889      | 3.6              |
| B9              | 798.3694         | 798.3668      | -3.3             |
| C9              | 815.3957         | 815.3983      | 3.2              |
| Z8              | 863.415          | 863.4181      | 3.6              |
| A10             | 933.4378         | 933.4384      | 0.6              |
| A+10            | 934.4457         | 934.4445      | -1.2             |
| Y9              | 976.4866         | 976.4877      | 1.2              |
| C10             | 978.459          | 978.4656      | 6.7              |
| X+9             | 1003.474         | 1003.466      | -7.9             |
| A+11            | 1021.478         | 1021.477      | -0.6             |
| Y10             | 1063.519         | 1063.523      | 3.9              |
| A12             | 1117.523         | 1117.523      | 0.2              |
| C12             | 1162.544         | 1162.545      | 1.1              |
| B13             | 1246.565         | 1246.556      | -7.0             |
| C13             | 1263.592         | 1263.594      | 2.1              |
| A+14            | 1306.61          | 1306.61       | -0.4             |
| B14             | 1333.597         | 1333.598      | 0.6              |
| Y12             | 1393.58          | 1393.585      | 3.1              |
| A15             | 1402.655         | 1402.654      | -0.8             |
| A+15            | 1403.663         | 1403.664      | 0.6              |
| X+12            | 1420.567         | 1420.571      | 2.6              |
| C15             | 1447.676         | 1447.679      | 1.6              |
| Y13             | 1490.633         | 1490.631      | -1.6             |
| B16             | 1517.682         | 1517.682      | 0.2              |
| Y14             | 1577.665         | 1577.667      | 1.5              |
| A+17            | 1733.725         | 1733.727      | 1.2              |
| B17             | 1760.712         | 1760.714      | 1.1              |
| Y16             | 1775.766         | 1775.766      | 0.3              |
| X+16            | 1802.753         | 1802.752      | -0.4             |
| A+18            | 1820.757         | 1820.772      | 8.4              |
| A19             | 1916.802         | 1916.783      | -9.6             |
| A20             | 2017.849         | 2017.867      | 8.6              |
| C20             | 2062.87          | 2062.879      | 4.3              |
| A+21            | 2105.889         | 2105.891      | 1.0              |
| Z19             | 2137.937         | 2137.935      | -0.8             |
| X19             | 2179.935         | 2179.938      | 1.2              |
| A+22            | 2202.942         | 2202.954      | 5.3              |
| Y-20            | 2250.001         | 2249.999      | -0.6             |
| Y21             | 2338.041         | 2338.042      | 0.7              |
| X+21            | 2365.028         | 2365.029      | 0.6              |



|      |          |          |      |      |          |          |      |
|------|----------|----------|------|------|----------|----------|------|
| X+19 | 2180.943 | 2180.955 | 5.4  | C23  | 2375.05  | 2375.035 | -6.4 |
| A22  | 2201.934 | 2201.934 | -0.1 | Z22  | 2453.062 | 2453.062 | -0.1 |
| Y-20 | 2250.001 | 2249.999 | -0.8 | Y22  | 2469.081 | 2469.09  | 3.4  |
| A+23 | 2331.037 | 2331.042 | 2.4  | A24  | 2493.092 | 2493.104 | 4.6  |
| Y21  | 2338.041 | 2338.039 | -0.6 | Y-23 | 2525.095 | 2525.101 | 2.7  |
| B23  | 2358.024 | 2358.03  | 2.4  | C24  | 2538.114 | 2538.115 | 0.7  |
| C23  | 2375.05  | 2375.045 | -2.2 | X+23 | 2553.09  | 2553.095 | 2.1  |
| Y22  | 2469.081 | 2469.082 | 0.5  | A+25 | 2581.132 | 2581.131 | -0.6 |
| A24  | 2493.092 | 2493.095 | 1.2  | B25  | 2608.119 | 2608.123 | 1.4  |
| B24  | 2521.087 | 2521.086 | -0.6 | Y25  | 2670.156 | 2670.171 | 5.5  |
| Y23  | 2526.103 | 2526.109 | 2.6  | A+26 | 2678.185 | 2678.189 | 1.5  |
| C24  | 2538.114 | 2538.118 | 1.7  | X25  | 2696.135 | 2696.14  | 1.7  |
| X23  | 2552.082 | 2552.096 | 5.5  | Y-26 | 2766.201 | 2766.213 | 4.4  |
| A25  | 2580.124 | 2580.124 | 0.0  |      |          |          |      |
| B25  | 2608.119 | 2608.123 | 1.6  |      |          |          |      |
| Y25  | 2670.156 | 2670.166 | 3.9  |      |          |          |      |
| A+26 | 2678.185 | 2678.188 | 1.3  |      |          |          |      |
| X25  | 2696.135 | 2696.133 | -1.0 |      |          |          |      |
| B26  | 2705.172 | 2705.175 | 1.0  |      |          |          |      |
| Y-26 | 2766.201 | 2766.214 | 4.6  |      |          |          |      |

### B) 3xS7Q Mid Rep. #2 peak:

| Identified Ions | Theoretical Mass | Observed Mass | Mass Error (ppm) |
|-----------------|------------------|---------------|------------------|
| A+6             | 459.2026         | 459.204       | 3.1              |
| Y4              | 466.2064         | 466.2073      | 1.9              |
| C6              | 503.216          | 503.2138      | -4.3             |
| A+8             | 643.2874         | 643.2895      | 3.4              |
| Y6              | 650.2912         | 650.292       | 1.3              |
| C8              | 687.3008         | 687.3024      | 2.4              |
| A+9             | 730.3194         | 730.3194      | 0.0              |
| Y7              | 737.3232         | 737.325       | 2.4              |
| C9              | 774.3328         | 774.3337      | 1.2              |
| Y8              | 838.3709         | 838.372       | 1.4              |
| B10             | 920.3698         | 920.3707      | 0.9              |
| Y9              | 935.4236         | 935.425       | 1.5              |
| X+9             | 962.4107         | 962.411       | 0.3              |
| A+11            | 980.4148         | 980.4127      | -2.1             |
| B11             | 1007.402         | 1007.402      | 0.5              |
| A+12            | 1077.468         | 1077.464      | -3.3             |
| A13             | 1177.507         | 1177.5        | -6.4             |
| B13             | 1205.502         | 1205.504      | 1.1              |
| Y11             | 1265.485         | 1265.497      | 9.2              |
| B14             | 1292.534         | 1292.537      | 1.9              |
| Y13             | 1490.597         | 1490.596      | -0.1             |
| B16             | 1517.646         | 1517.646      | 0.2              |
| Y14             | 1577.629         | 1577.633      | 2.9              |
| A17             | 1732.68          | 1732.694      | 8.1              |
| B17             | 1760.675         | 1760.678      | 1.3              |
| Y16             | 1775.729         | 1775.73       | 0.4              |
| X+16            | 1802.716         | 1802.709      | -4.0             |
| B18             | 1847.707         | 1847.71       | 1.6              |
| Y17             | 1862.761         | 1862.762      | 0.7              |
| Z19             | 2096.838         | 2096.819      | -8.7             |
| A21             | 2104.845         | 2104.852      | 3.2              |
| B21             | 2132.84          | 2132.845      | 2.4              |
| Y20             | 2209.909         | 2209.911      | 0.6              |
| Z21             | 2280.923         | 2280.917      | -2.3             |
| Y21             | 2296.941         | 2296.945      | 1.5              |

### 3xS7Q Mid Rep. #3 peak:

| Identified Ions | Theoretical Mass | Observed Mass | Mass Error (ppm) |
|-----------------|------------------|---------------|------------------|
| B5              | 355.1492         | 355.1504      | 3.4              |
| B6              | 486.1897         | 486.1904      | 1.4              |
| C6              | 503.216          | 503.2167      | 1.5              |
| A+8             | 643.2874         | 643.288       | 1.0              |
| C8              | 687.3008         | 687.3028      | 3.0              |
| Y6              | 730.2575         | 730.2582      | 1.0              |
| C9              | 774.3328         | 774.3339      | 1.5              |
| Y7              | 817.2895         | 817.2904      | 1.1              |
| A10             | 892.3749         | 892.3706      | -4.8             |
| B10             | 920.3698         | 920.3709      | 1.1              |
| C10             | 937.3961         | 937.399       | 3.1              |
| A11             | 979.4069         | 979.4063      | -0.7             |
| B11             | 1007.402         | 1007.403      | 1.2              |
| Y9              | 1015.39          | 1015.391      | 1.2              |
| A+12            | 1077.468         | 1077.468      | 0.3              |
| Y10             | 1102.422         | 1102.424      | 1.8              |
| A13             | 1177.507         | 1177.506      | -1.4             |
| B13             | 1205.502         | 1205.504      | 1.7              |
| A14             | 1264.539         | 1264.538      | -1.1             |
| B14             | 1292.534         | 1292.537      | 2.0              |
| Y13             | 1490.597         | 1490.598      | 1.0              |
| B16             | 1517.646         | 1517.649      | 2.5              |
| C16             | 1534.672         | 1534.674      | 1.6              |
| Y14             | 1577.629         | 1577.63       | 0.8              |
| A17             | 1652.714         | 1652.711      | -1.9             |
| B17             | 1680.709         | 1680.71       | 0.9              |
| A18             | 1739.746         | 1739.735      | -6.6             |
| B18             | 1767.741         | 1767.742      | 0.8              |
| Y16             | 1775.729         | 1775.73       | 0.6              |
| Y17             | 1862.761         | 1862.763      | 1.1              |
| B20             | 1965.841         | 1965.848      | 3.2              |
| B21             | 2052.873         | 2052.879      | 2.8              |
| B23             | 2236.958         | 2236.954      | -2.1             |
| Y21             | 2296.941         | 2296.947      | 2.5              |
| A+24            | 2453.001         | 2453          | -0.4             |

|      |          |          |      |     |          |          |      |
|------|----------|----------|------|-----|----------|----------|------|
| C23  | 2333.951 | 2333.954 | 1.1  | B24 | 2479.988 | 2479.991 | 1.3  |
| A24  | 2451.993 | 2451.998 | 2.0  | A25 | 2539.025 | 2539.019 | -2.4 |
| B24  | 2479.988 | 2479.993 | 1.9  | B25 | 2567.02  | 2567.027 | 2.7  |
| C24  | 2497.014 | 2497.032 | 7.3  |     |          |          |      |
| A25  | 2539.025 | 2539.018 | -2.6 |     |          |          |      |
| B25  | 2567.02  | 2567.026 | 2.3  |     |          |          |      |
| Y26  | 2726.11  | 2726.11  | 0.1  |     |          |          |      |
| X+26 | 2753.097 | 2753.12  | 8.4  |     |          |          |      |

**C) 3xS7Q Sp Rep. #1 peak:**

| Identified Ions | Theoretical Mass | Observed Mass | Mass Error (ppm) |
|-----------------|------------------|---------------|------------------|
| B4              | 298.1277         | 298.1275      | -0.7             |
| Y3              | 303.143          | 303.1433      | 0.8              |
| A+6             | 459.2026         | 459.2025      | -0.1             |
| Y4              | 466.2064         | 466.2066      | 0.6              |
| C6              | 503.216          | 503.2165      | 1.1              |
| Z5              | 578.2462         | 578.2459      | -0.5             |
| A+8             | 643.2874         | 643.2864      | -1.4             |
| Y6              | 691.3177         | 691.3185      | 1.1              |
| A+9             | 771.3459         | 771.3408      | -6.6             |
| C9              | 815.3593         | 815.3591      | -0.3             |
| X8              | 905.3767         | 905.3791      | 2.7              |
| Y9              | 976.4502         | 976.451       | 0.8              |
| A+10            | 1014.376         | 1014.375      | -0.4             |
| B10             | 1041.363         | 1041.362      | -1.1             |
| Y10             | 1063.482         | 1063.484      | 1.5              |
| A+11            | 1101.408         | 1101.402      | -5.4             |
| B11             | 1128.395         | 1128.396      | 1.2              |
| Y11             | 1226.546         | 1226.552      | 5.0              |
| A13             | 1298.5           | 1298.504      | 2.9              |
| B13             | 1326.495         | 1326.498      | 1.9              |
| C13             | 1343.521         | 1343.519      | -1.9             |
| A+14            | 1386.54          | 1386.532      | -5.5             |
| Y13             | 1410.63          | 1410.632      | 1.3              |
| B14             | 1413.527         | 1413.527      | -0.4             |
| Y14             | 1497.662         | 1497.664      | 1.2              |
| B16             | 1597.612         | 1597.615      | 2.2              |
| C16             | 1614.638         | 1614.641      | 2.0              |
| Y-16            | 1694.755         | 1694.748      | -3.8             |
| A17             | 1732.68          | 1732.681      | 0.2              |
| B17             | 1760.675         | 1760.675      | -0.1             |
| Y17             | 1782.795         | 1782.799      | 2.3              |
| A18             | 1819.712         | 1819.713      | 0.3              |
| B18             | 1847.707         | 1847.711      | 1.8              |
| B20             | 2045.808         | 2045.812      | 2.0              |
| B21             | 2132.84          | 2132.83       | -4.8             |
| Y20             | 2250.936         | 2250.937      | 0.7              |
| A+23            | 2330.964         | 2330.968      | 1.8              |
| Y21             | 2337.968         | 2337.966      | -0.6             |
| B23             | 2357.951         | 2357.965      | 5.7              |
| C23             | 2374.977         | 2374.975      | -0.9             |
| B24             | 2521.014         | 2521.017      | 1.1              |
| A25             | 2580.052         | 2580.05       | -0.4             |
| B25             | 2608.047         | 2608.044      | -0.8             |

**3xS7Q Sp Rep. #2 peak:**

| Identified Ions | Theoretical Mass | Observed Mass | Mass Error (ppm) |
|-----------------|------------------|---------------|------------------|
| B4              | 298.1277         | 298.1278      | 0.2              |
| A+6             | 459.2026         | 459.2037      | 2.5              |
| Y4              | 466.2064         | 466.2068      | 0.9              |
| B6              | 486.1897         | 486.1902      | 1.1              |
| C6              | 503.216          | 503.2172      | 2.5              |
| B7              | 573.2217         | 573.2225      | 1.4              |
| Z5              | 578.2462         | 578.2471      | 1.7              |
| A+8             | 643.2874         | 643.2881      | 1.2              |
| Y6              | 691.3177         | 691.3189      | 1.8              |
| Y7              | 778.3497         | 778.3518      | 2.6              |
| C9              | 815.3593         | 815.3616      | 2.8              |
| A10             | 933.4014         | 933.4018      | 0.4              |
| B10             | 961.3964         | 961.3984      | 2.1              |
| Y9              | 976.4502         | 976.452       | 1.9              |
| X9              | 1002.429         | 1002.425      | -4.7             |
| A+11            | 1021.441         | 1021.442      | 0.8              |
| B11             | 1048.428         | 1048.429      | 0.7              |
| Y10             | 1063.482         | 1063.485      | 2.8              |
| A+12            | 1118.494         | 1118.491      | -3.0             |
| B13             | 1246.529         | 1246.529      | -0.1             |
| C13             | 1263.555         | 1263.548      | -5.4             |
| B14             | 1333.561         | 1333.564      | 2.4              |
| Y12             | 1393.544         | 1393.548      | 2.7              |
| A+15            | 1403.627         | 1403.626      | -0.7             |
| Y13             | 1490.597         | 1490.599      | 1.4              |
| B16             | 1517.646         | 1517.644      | -1.0             |
| C16             | 1534.672         | 1534.671      | -0.9             |
| Y14             | 1577.629         | 1577.633      | 2.7              |
| A17             | 1732.68          | 1732.693      | 7.2              |
| B17             | 1760.675         | 1760.668      | -3.9             |
| Y16             | 1775.729         | 1775.73       | 0.7              |
| X+16            | 1802.716         | 1802.711      | -2.6             |
| A+18            | 1820.72          | 1820.734      | 7.7              |
| B18             | 1847.707         | 1847.714      | 3.4              |
| Y17             | 1862.761         | 1862.764      | 1.5              |
| Y18             | 2025.824         | 2025.83       | 2.8              |
| B20             | 2045.808         | 2045.811      | 1.8              |
| B21             | 2132.84          | 2132.822      | -8.5             |
| A+22            | 2202.905         | 2202.904      | -0.8             |
| Y20             | 2250.936         | 2250.936      | 0.2              |
| A+23            | 2330.964         | 2330.968      | 1.6              |
| B23             | 2357.951         | 2357.963      | 4.9              |
| C23             | 2374.977         | 2374.97       | -3.3             |
| B24             | 2521.014         | 2521.019      | 2.0              |
| X+23            | 2553.017         | 2552.994      | -9.1             |
| A25             | 2580.052         | 2580.054      | 1.0              |
| B25             | 2608.047         | 2608.07       | 9.2              |
| A26             | 2677.104         | 2677.085      | -7.1             |
| Z26             | 2751.117         | 2751.139      | 7.8              |

**3xS7Q Sp Rep. #3 peak:**

| Identified Ions | Theoretical Mass | Observed Mass | Mass Error (ppm) |
|-----------------|------------------|---------------|------------------|
| Y3              | 303.143          | 303.1433      | 0.9              |
| C8              | 687.3008         | 687.3014      | 1.0              |
| Y6              | 771.284          | 771.2842      | 0.2              |
| B9              | 798.333          | 798.3345      | 1.8              |
| C9              | 815.3593         | 815.3613      | 2.4              |
| Y7              | 858.3161         | 858.3172      | 1.4              |
| A10             | 933.4014         | 933.4004      | -1.2             |
| Y8              | 959.3637         | 959.3659      | 2.2              |
| B10             | 961.3964         | 961.3957      | -0.7             |
| C10             | 978.4227         | 978.4238      | 1.1              |
| A+11            | 1021.441         | 1021.438      | -2.8             |
| B11             | 1048.428         | 1048.429      | 0.3              |
| Y9              | 1056.417         | 1056.419      | 2.0              |
| Y10             | 1143.449         | 1143.449      | 0.7              |
| B13             | 1246.529         | 1246.528      | -0.5             |
| C13             | 1263.555         | 1263.544      | -8.8             |
| B14             | 1333.561         | 1333.563      | 1.6              |
| Y12             | 1393.544         | 1393.55       | 4.3              |
| Y13             | 1490.597         | 1490.597      | 0.4              |
| B16             | 1517.646         | 1517.648      | 1.9              |
| C16             | 1534.672         | 1534.674      | 1.1              |
| Y14             | 1577.629         | 1577.632      | 2.1              |
| B17             | 1680.709         | 1680.708      | -0.8             |
| B18             | 1767.741         | 1767.742      | 0.8              |
| Y16             | 1775.729         | 1775.73       | 0.7              |
| Y17             | 1862.761         | 1862.764      | 1.6              |
| B20             | 1965.841         | 1965.844      | 1.5              |
| Y18             | 2025.824         | 2025.842      | 8.7              |
| Y20             | 2250.936         | 2250.926      | -4.2             |
| B23             | 2277.985         | 2277.984      | -0.2             |
| Y21             | 2337.968         | 2337.968      | -0.1             |
| B24             | 2521.014         | 2521.017      | 0.9              |
| B25             | 2608.047         | 2608.053      | 2.4              |
